# Supplementary material for: Benzofuran Derivatives from Cortex Mori Radicis and Their Cholinesterase-Inhibitory Activity
Source: MDPI journal article supplement (doi:10.3390/molecules29020315), 2024-01-08
Supplement: s1 [file s1]

## Supplementary Materials

# Benzofuran derivatives from Cortex Mori Radicis and their cho-linesterase inhibitory activity

Xiang Cui<sup>1,2</sup>, Ze-Hong Huang<sup>1</sup>, Shan-Shan Deng<sup>1</sup>, Yun-Xia Zhang<sup>1</sup>, Guo-Yin Li<sup>1</sup>, Li-Ning Wang<sup>2</sup>, Yan-Ru Deng<sup>2\*</sup> and Chang-Jing Wu<sup>1,3\*</sup>

<sup>1</sup> College of Life Sciences and Agronomy, Zhoukou Normal University, Zhoukou 466001, China

<sup>2</sup> College of Traditional Chinese Medicine, Tianjin University of Traditional Chinese Medicine, Tianjin 301617, China

<sup>3</sup> Field Observation and Research Station of Green Agriculture in Dancheng County, Zhoukou 466001, China

\* Correspondence: dengyanru@tjutcm.edu.cn (Y.-R.D.); wucj2009@163.com (C.-J.W.)

## List of Supplementary Materials

|                                                                                                            |    |
|------------------------------------------------------------------------------------------------------------|----|
| Figure S1. HPLC detection of cis-trans-tautomerism of compounds 1 and 6 .....                              | 1  |
| Figure S2. Chiral HPLC analysis of compound 4.....                                                         | 1  |
| Figure S3. Secondary plots for the determination of the inhibitor constants.....                           | 2  |
| Figure S4. HRESIMS data of compound 1.....                                                                 | 3  |
| Figure S5. <sup>1</sup> H-NMR spectrum of compound 1 in acetone- <i>d</i> <sub>6</sub> .....               | 3  |
| Figure S6. <sup>13</sup> C-NMR and DEPT-135 spectra of compound 1 in acetone- <i>d</i> <sub>6</sub> .....  | 4  |
| Figure S7. HSQC spectrum of compound 1 .....                                                               | 4  |
| Figure S8. <sup>1</sup> H- <sup>1</sup> H COSY spectrum of compound 1 .....                                | 5  |
| Figure S9. HMBC spectrum of compound 1 .....                                                               | 5  |
| Figure S10. ROESY spectrum of compound 1 .....                                                             | 6  |
| Figure S11. HRESIMS data of compound 2.....                                                                | 6  |
| Figure S12. <sup>1</sup> H-NMR spectrum of compound 2 in acetone- <i>d</i> <sub>6</sub> .....              | 7  |
| Figure S13. <sup>13</sup> C-NMR and DEPT-135 spectra of compound 2 in acetone- <i>d</i> <sub>6</sub> ..... | 7  |
| Figure S14. HSQC spectrum of compound 2 .....                                                              | 8  |
| Figure S15. <sup>1</sup> H- <sup>1</sup> H COSY spectrum of compound 2 .....                               | 8  |
| Figure S16. HMBC spectrum of compound 2 .....                                                              | 9  |
| Figure S17. ROESY spectrum of compound 2 .....                                                             | 9  |
| Figure S18. HRESIMS data of compound 3.....                                                                | 10 |
| Figure S19. <sup>1</sup> H-NMR spectrum of compound 3 in CD <sub>3</sub> OD .....                          | 10 |
| Figure S20. <sup>13</sup> C-NMR and DEPT-135 spectra of compound 3 in CD <sub>3</sub> OD .....             | 11 |
| Figure S21. HSQC spectrum of compound 3 .....                                                              | 11 |
| Figure S22. <sup>1</sup> H- <sup>1</sup> H COSY spectrum of compound 3 .....                               | 12 |
| Figure S23. HMBC spectrum of compound 3 .....                                                              | 12 |
| Figure S24. CD spectrum of compound 3 .....                                                                | 13 |
| Figure S25. HRESIMS data of compound 4.....                                                                | 13 |
| Figure S26. <sup>1</sup> H-NMR spectrum of compound 4 in CD <sub>3</sub> OD .....                          | 14 |
| Figure S27. <sup>13</sup> C-NMR and DEPT-135 spectra of compound 4 in CD <sub>3</sub> OD .....             | 14 |
| Figure S28. HSQC spectrum of compound 4 .....                                                              | 15 |
| Figure S29. <sup>1</sup> H- <sup>1</sup> H COSY spectrum of compound 4 .....                               | 15 |
| Figure S30. HMBC spectrum of compound 4 .....                                                              | 16 |
| Figure S31. CD spectrum of compound 4 .....                                                                | 16 |
| Figure S32. HRESIMS data of compound 5.....                                                                | 17 |
| Figure S33. <sup>1</sup> H-NMR spectrum of compound 5 in CD <sub>3</sub> OD .....                          | 17 |
| Figure S34. <sup>13</sup> C-NMR and DEPT-135 spectra of compound 5 in CD <sub>3</sub> OD .....             | 18 |
| Figure S35. HSQC spectrum of compound 5 .....                                                              | 18 |
| Figure S36. <sup>1</sup> H- <sup>1</sup> H COSY spectrum of compound 5 .....                               | 19 |
| Figure S37. HMBC spectrum of compound 5 .....                                                              | 19 |
| Figure S38. <sup>1</sup> H-NMR spectrum of compound 6 in acetone- <i>d</i> <sub>6</sub> .....              | 20 |
| Figure S39. <sup>13</sup> C-NMR and DEPT-135 spectra of compound 6 in acetone- <i>d</i> <sub>6</sub> ..... | 20 |
| Figure S40. HSQC spectrum of compound 6 .....                                                              | 21 |
| Figure S41. <sup>1</sup> H- <sup>1</sup> H COSY spectrum of compound 6 .....                               | 21 |
| Figure S42. HMBC spectrum of compound 6 .....                                                              | 22 |
| Figure S43. <sup>1</sup> H-NMR spectrum of compound 14 in CD <sub>3</sub> OD .....                         | 22 |
| Figure S44. <sup>13</sup> C-NMR spectrum of compound 14 in CD <sub>3</sub> OD .....                        | 23 |

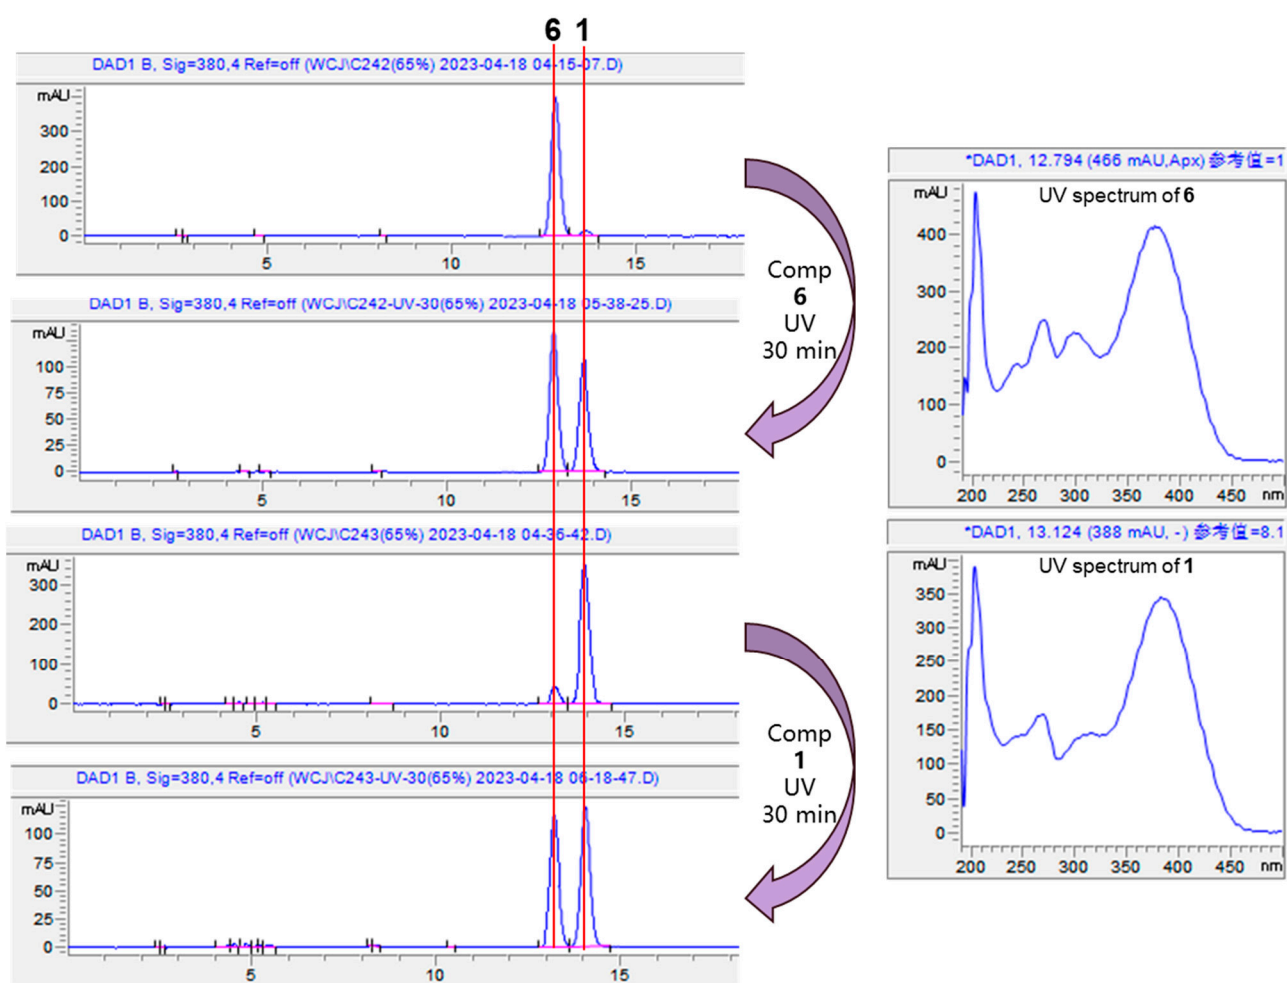

Figure S1. HPLC detection of cis-trans-tautomerism of compounds 1 and 6 promoted by UV exposure. Samples were analyzed on an Agilent 1100 HPLC system using an analytical Kromasil C-18 column (5  $\mu$ m, 100 Å, 4.6 mm  $\times$  250 mm; Akzo Nobel), with 65% aqueous methanol as mobile phase, detected at 380 nm.

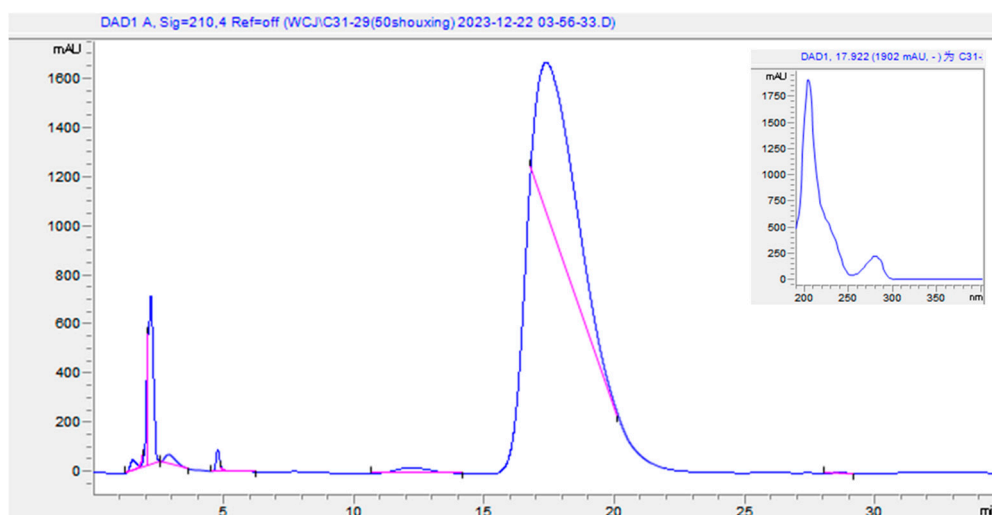

Figure S2. Chiral HPLC analysis of compound 4. The HPLC analysis was conducted with a CHIRALPAK® AD-RH column (5  $\mu$ m, 4.6 mm  $\times$  150 mm, Daicel Chiral Technologies (China) CO., LTD.) using 50% methanol as mobile phase with flow rate of 1 ml/min at 30°C.

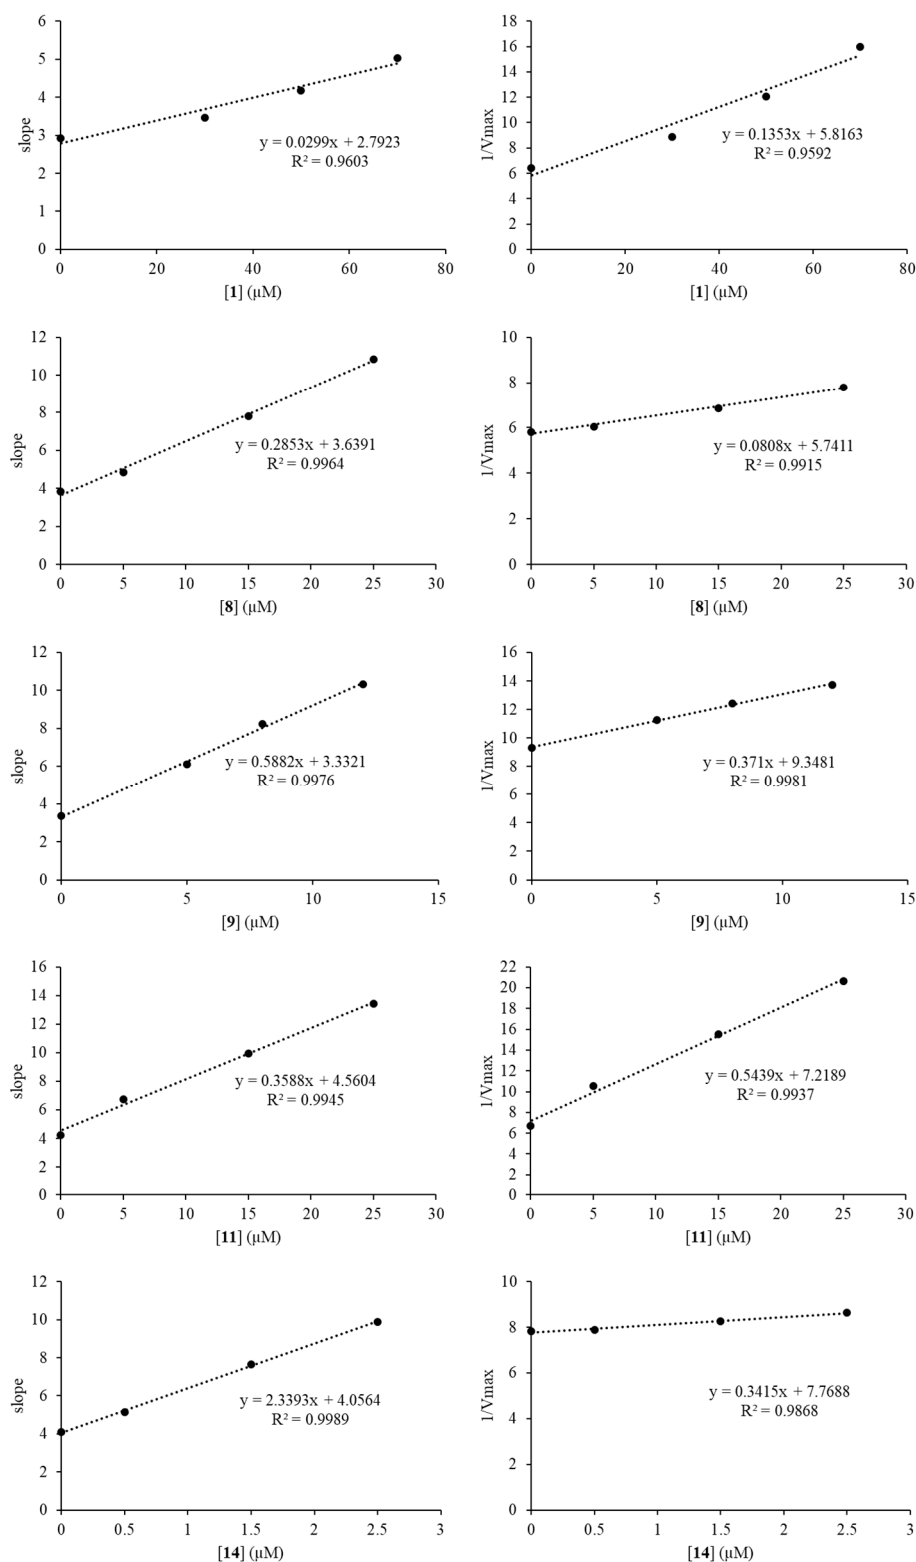

Figure S3. Secondary plots for the determination of the inhibitor constants for mixed-type inhibitors **1**, **8**, **9**, **11**, and **14**. 1/V is plotted as a function of [I], and the value of  $-\alpha K_i$  is determined from the x intercept of the line. The value of  $-K_i$  is determined from the x intercept of a plot of the slope of the lines from the double-reciprocal (Lineweaver — Burk) plot as a function of [I].

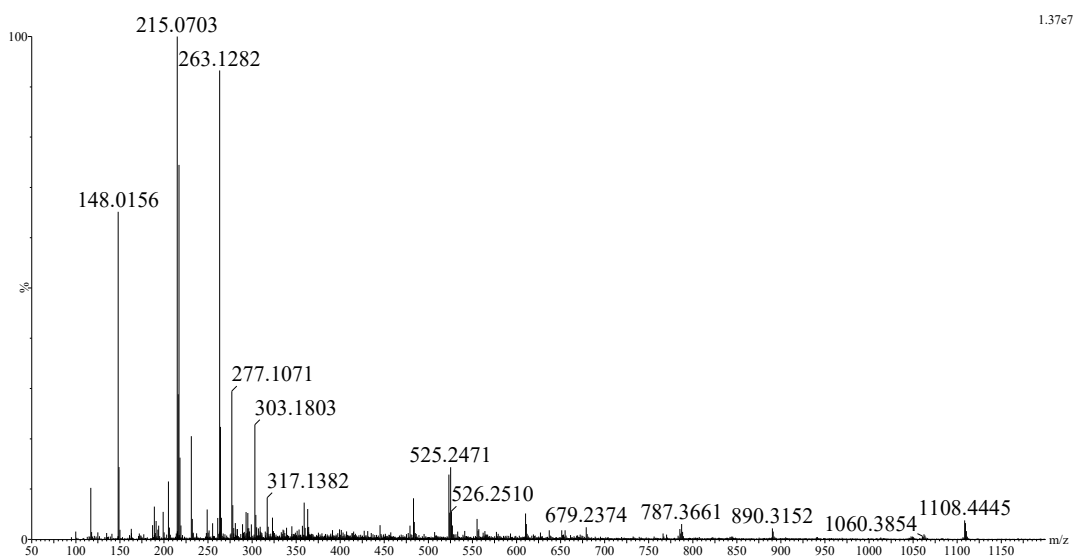

Figure S4. HRESIMS data of compound **1**

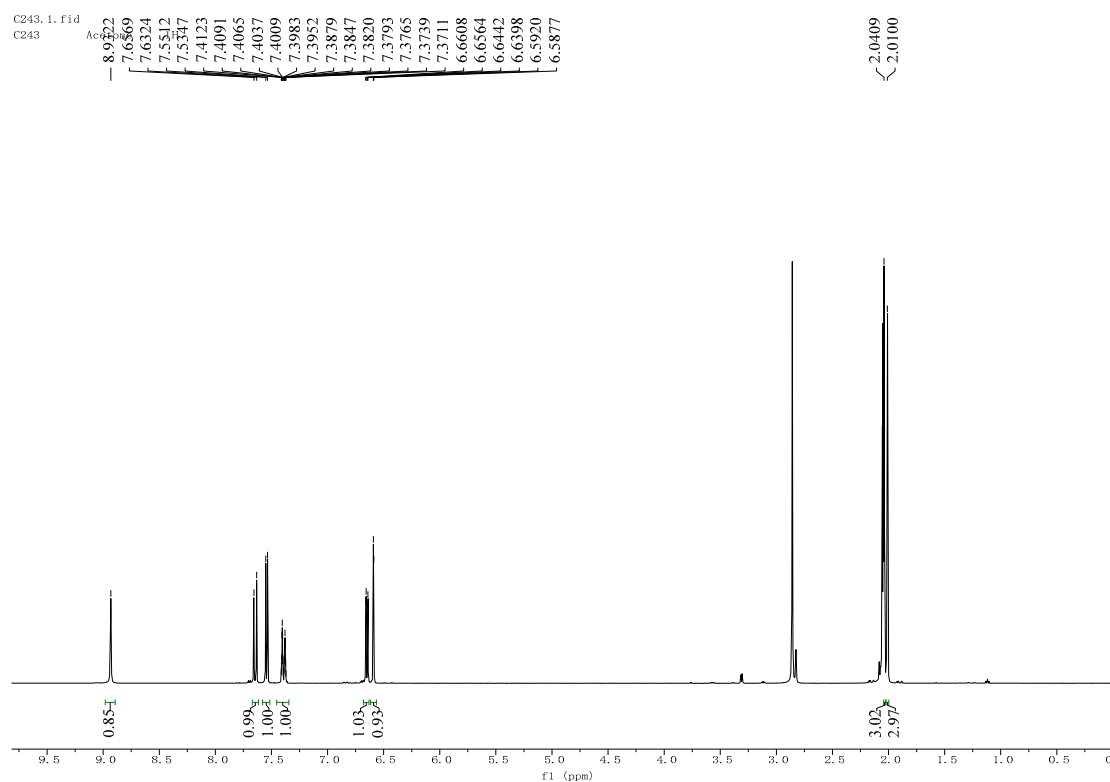

Figure S5. <sup>1</sup>H-NMR spectrum of compound **1** in acetone-*d*<sub>6</sub>

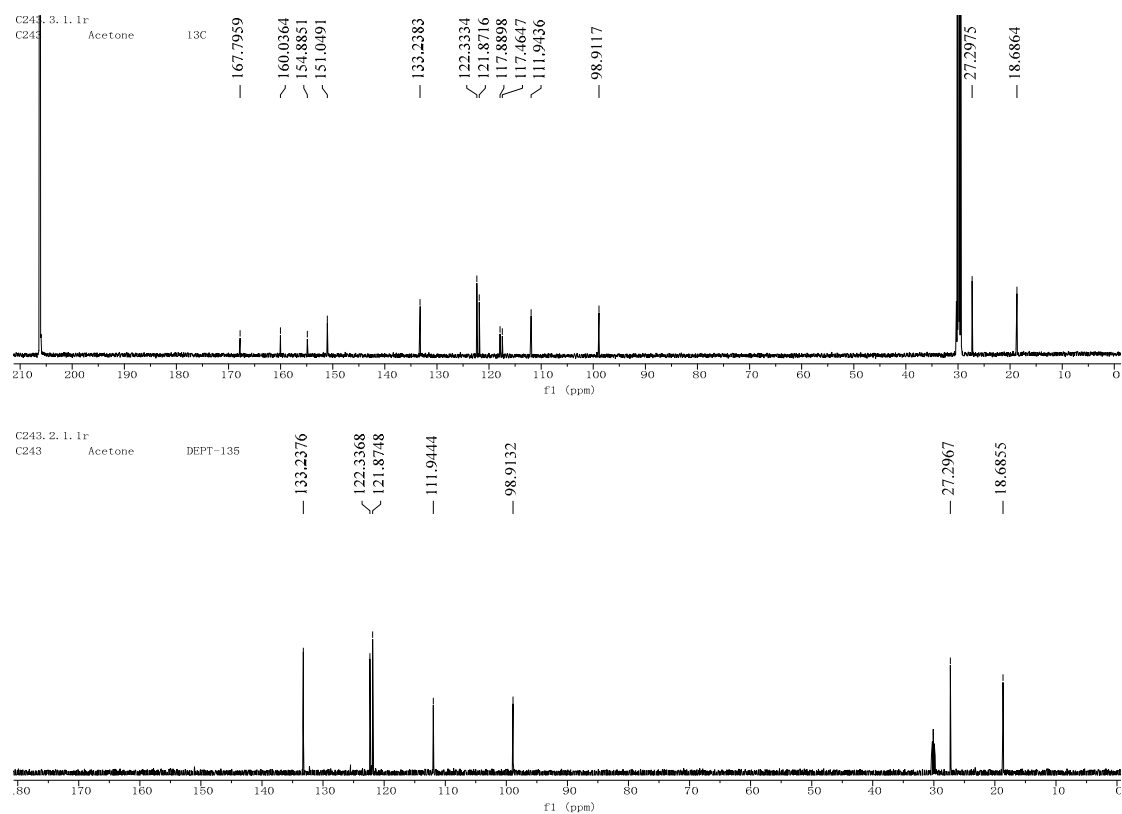

Figure S6. <sup>13</sup>C-NMR and DEPT-135 spectra of compound **1** in acetone-*d*<sub>6</sub>

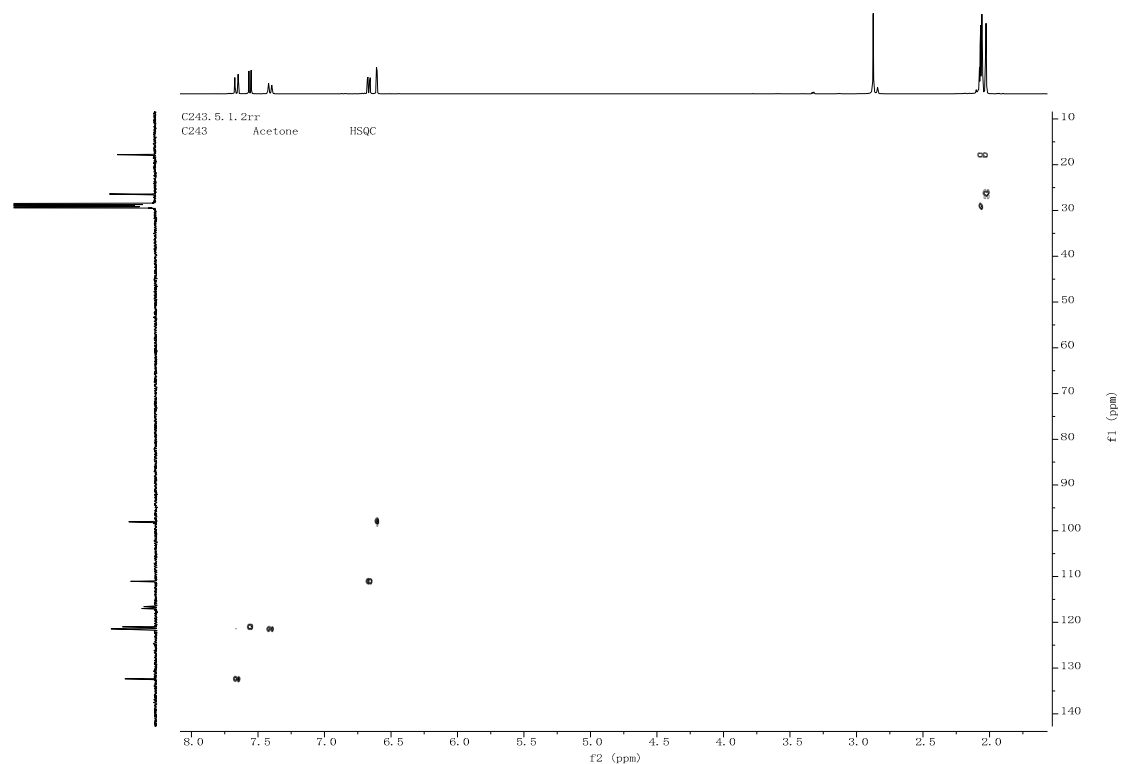

Figure S7. HSQC spectrum of compound **1**

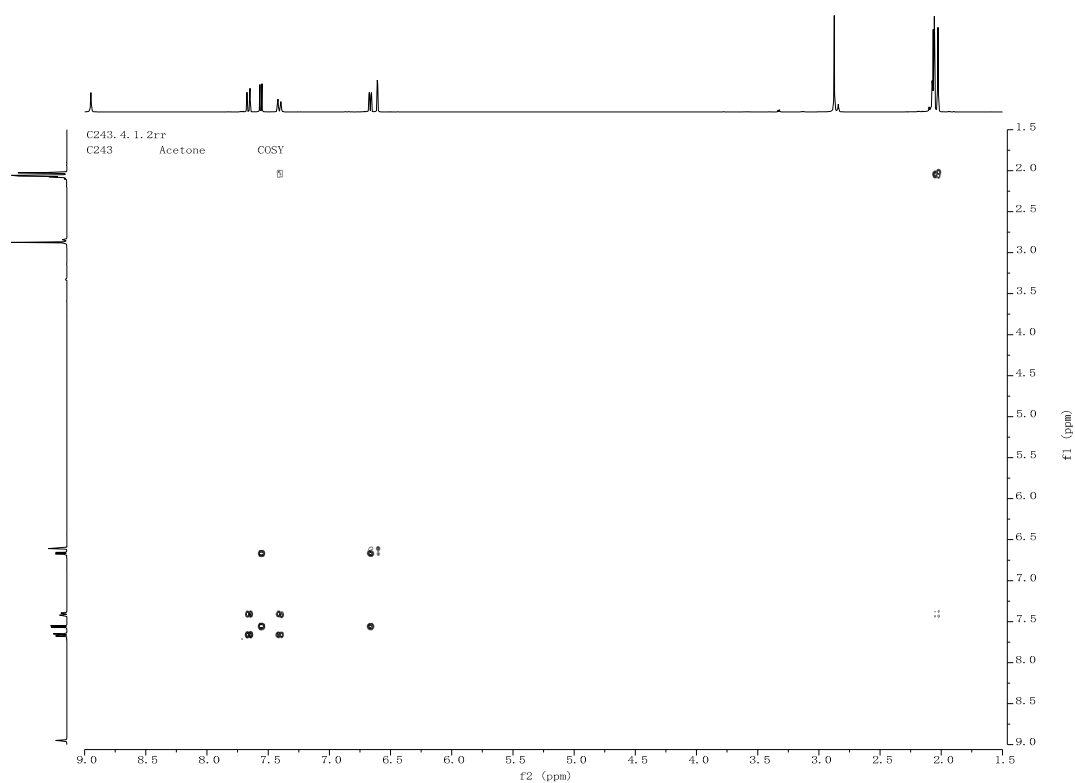

Figure S8.  $^1\text{H}$ - $^1\text{H}$  COSY spectrum of compound **1**

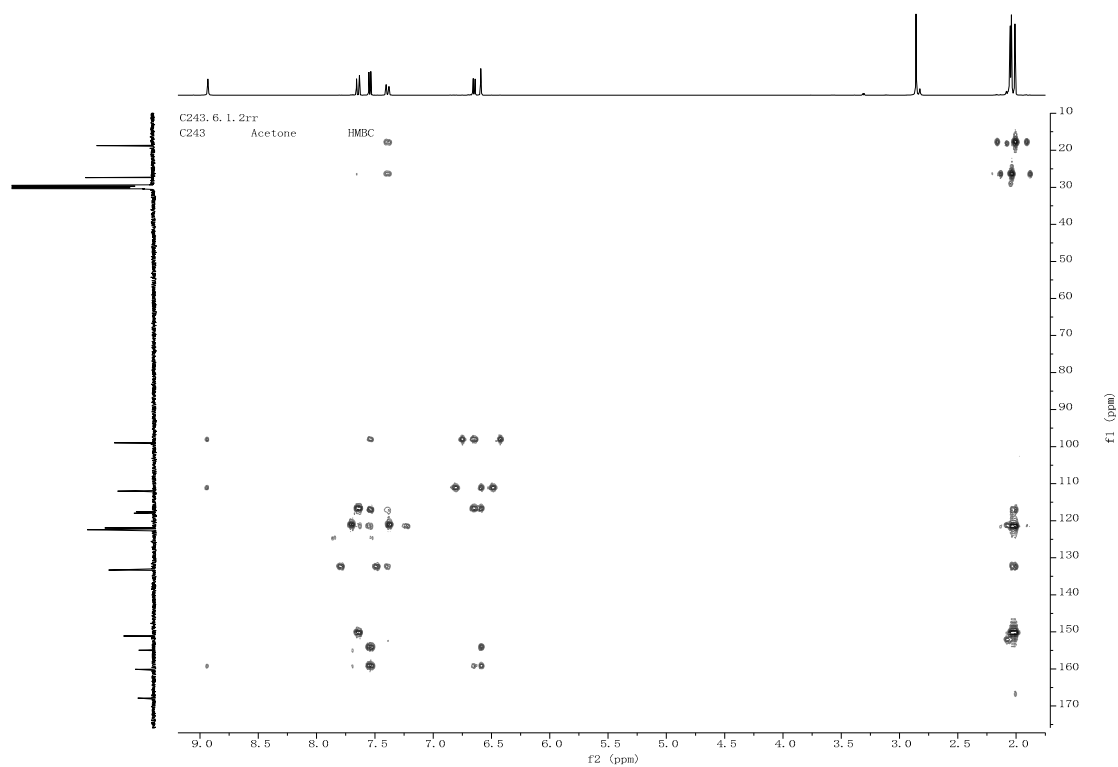

Figure S9. HMBC spectrum of compound **1**

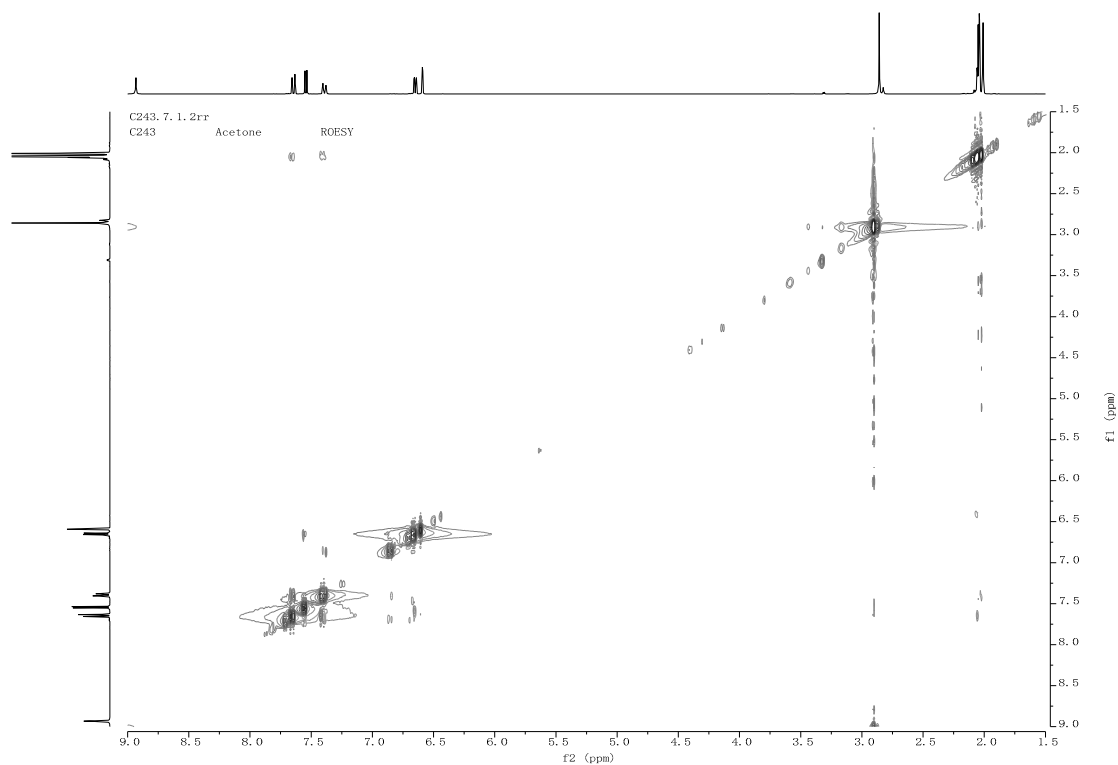

Figure S10. ROESY spectrum of compound **1**

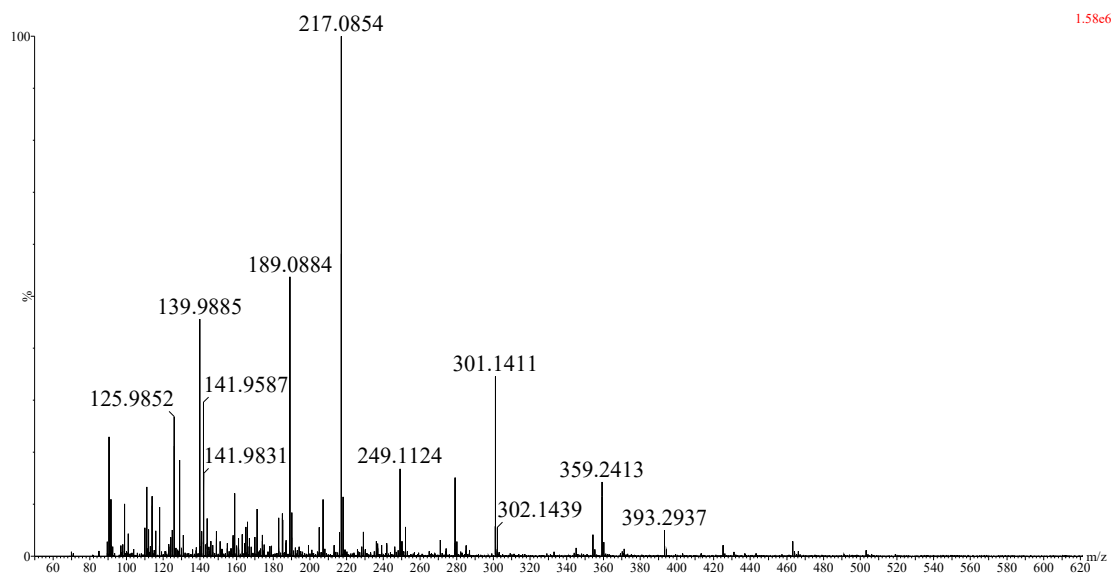

Figure S11. HRESIMS data of compound **2**



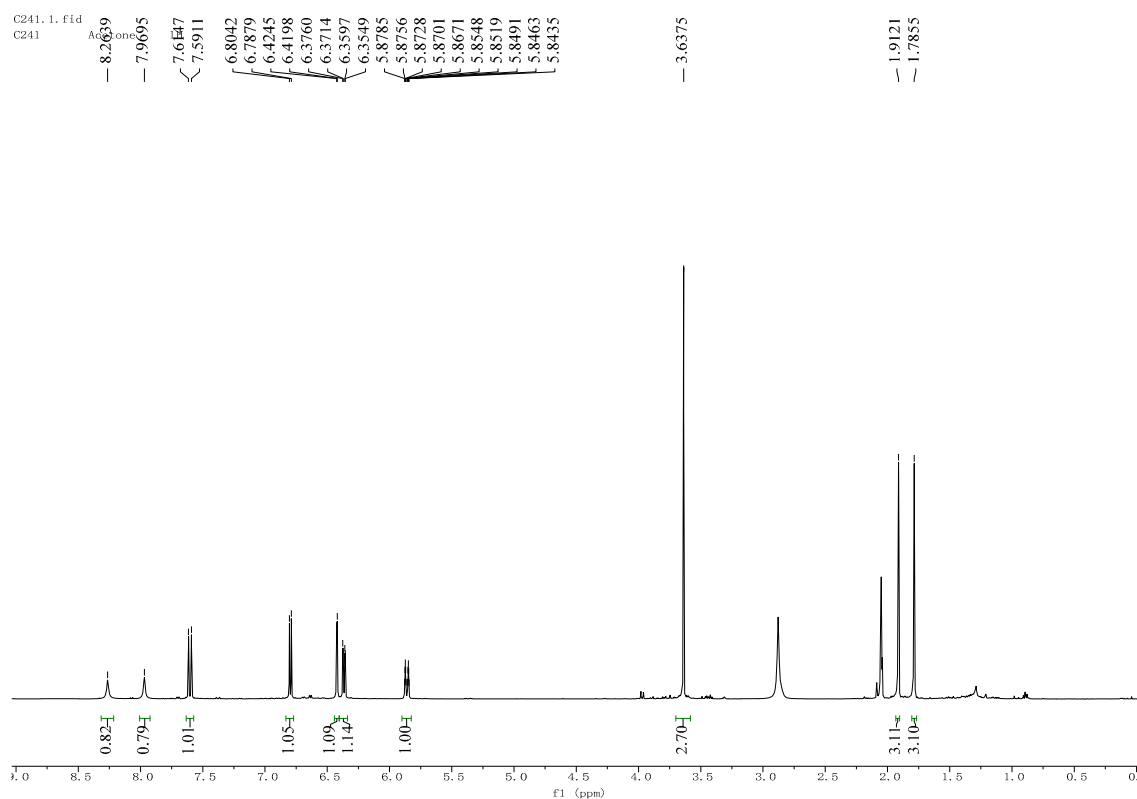

Figure S12.  $^1\text{H}$ -NMR spectrum of compound **2** in acetone- $d_6$

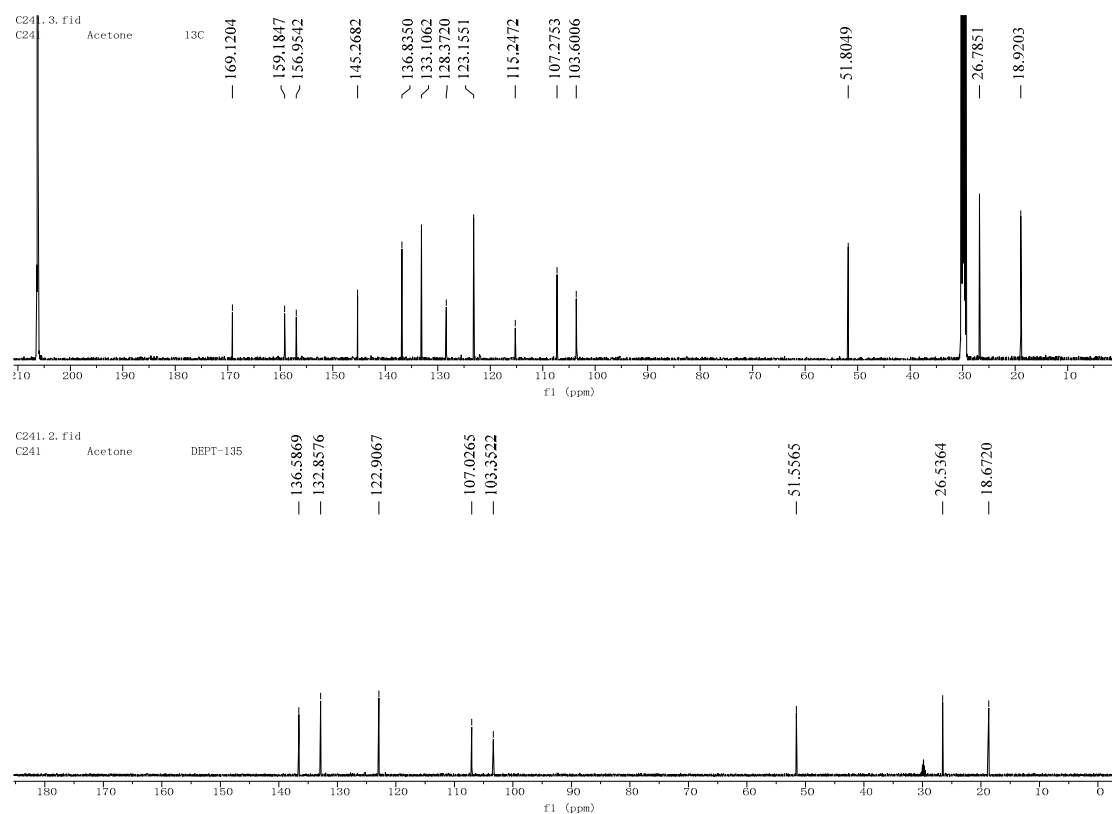

Figure S13.  $^{13}\text{C}$ -NMR and DEPT-135 spectra of compound **2** in acetone- $d_6$

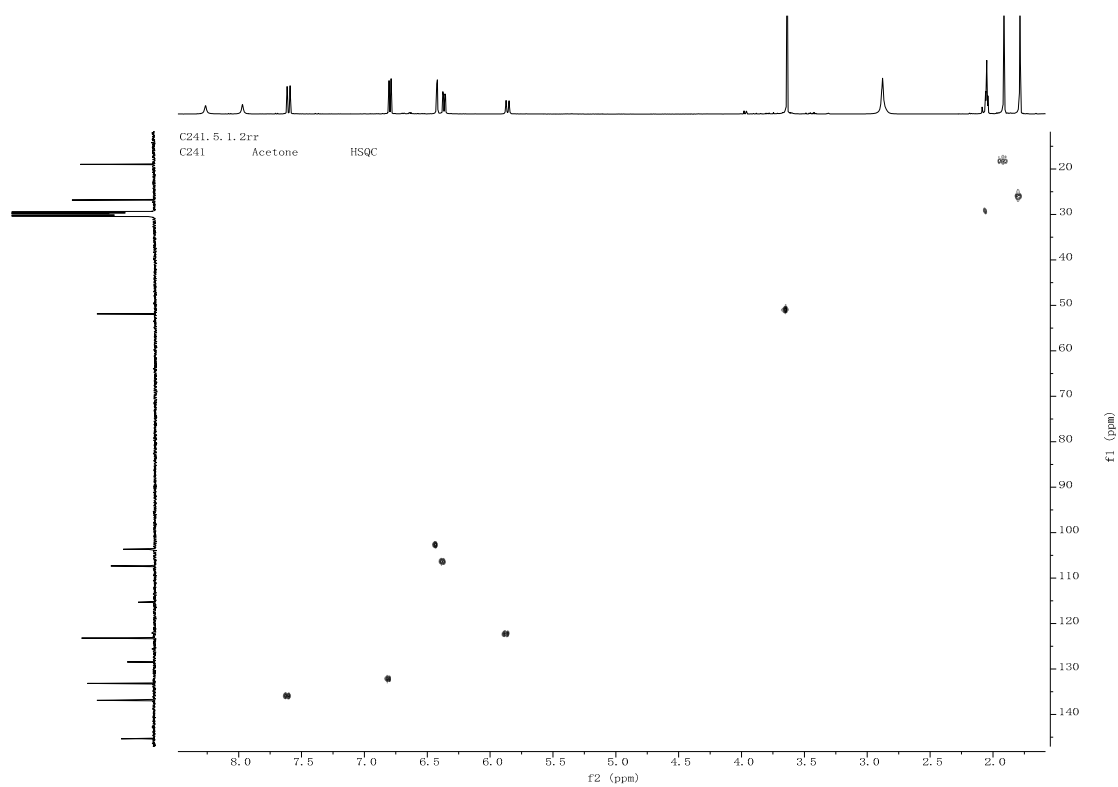

Figure S14. HSQC spectrum of compound 2

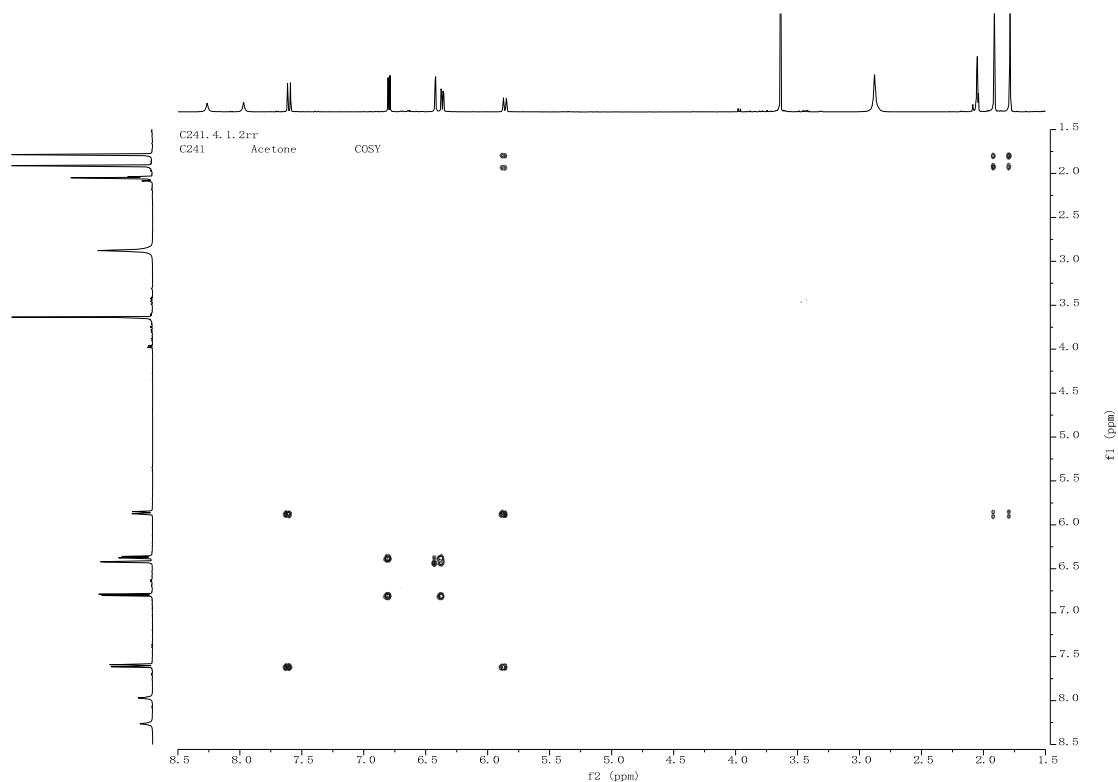

Figure S15.  $^1\text{H}$ - $^1\text{H}$  COSY spectrum of compound 2

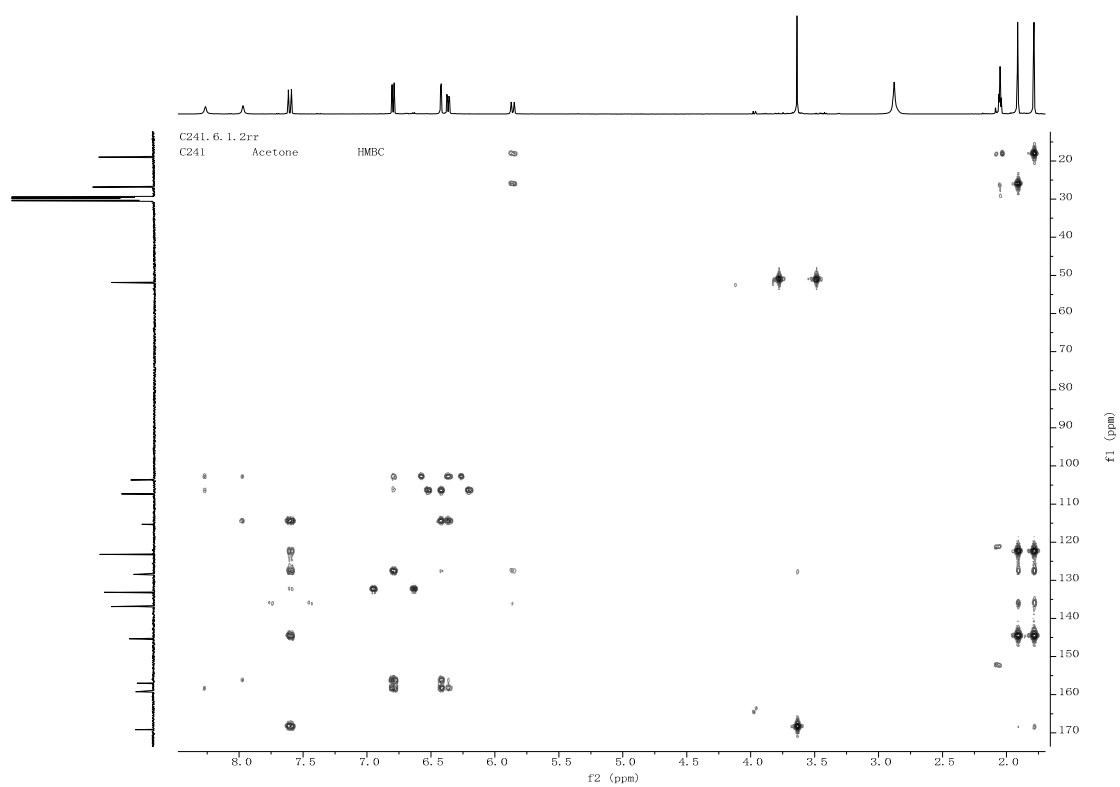

Figure S16. HMBC spectrum of compound 2

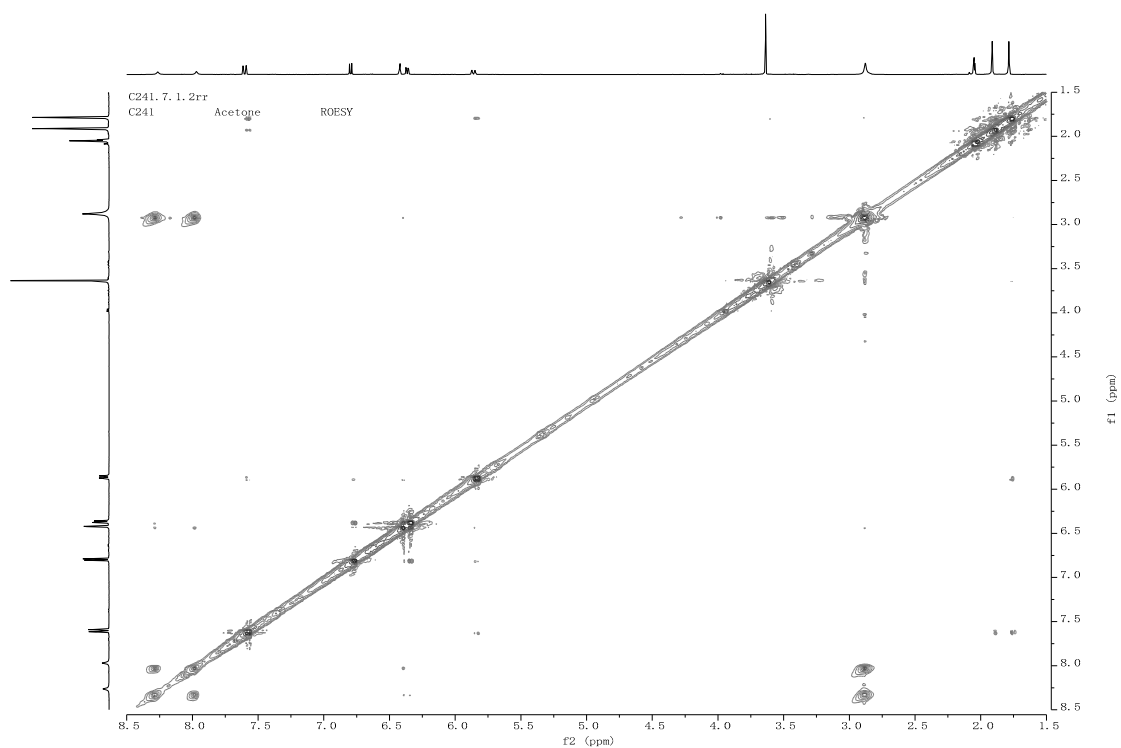

Figure S17. ROESY spectrum of compound 2

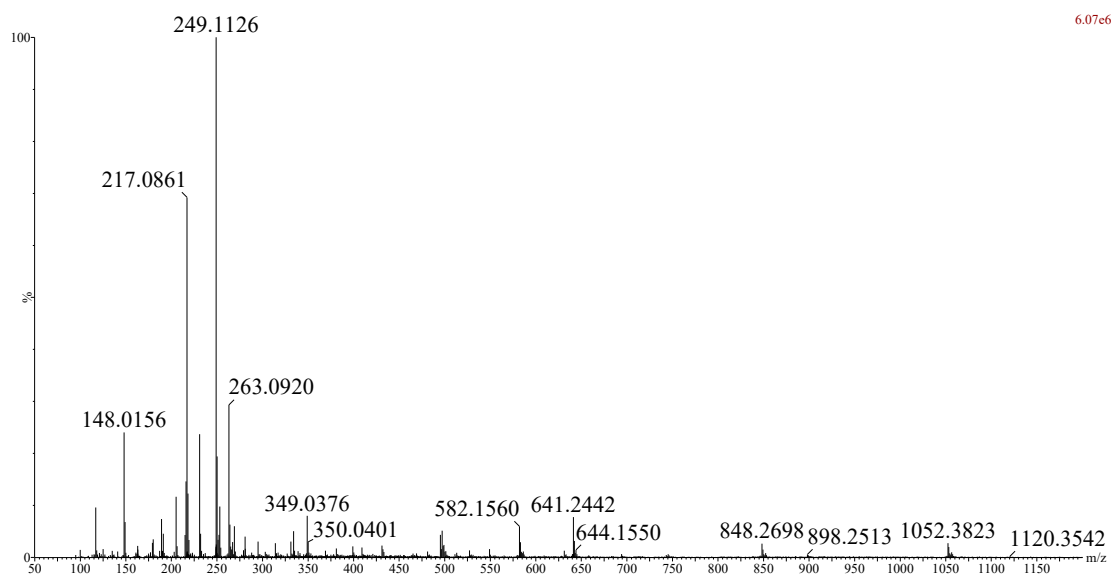

Figure S18. HRESIMS data of compound **3**

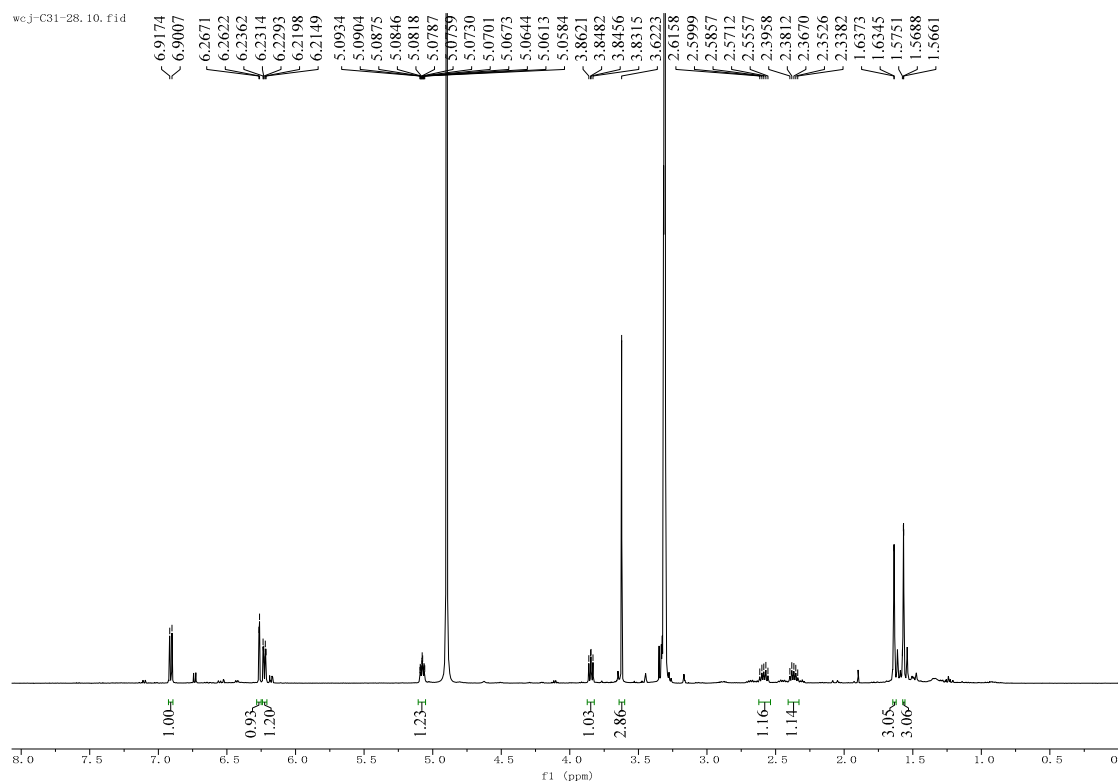

Figure S19. <sup>1</sup>H-NMR spectrum of compound **3** in CD<sub>3</sub>OD

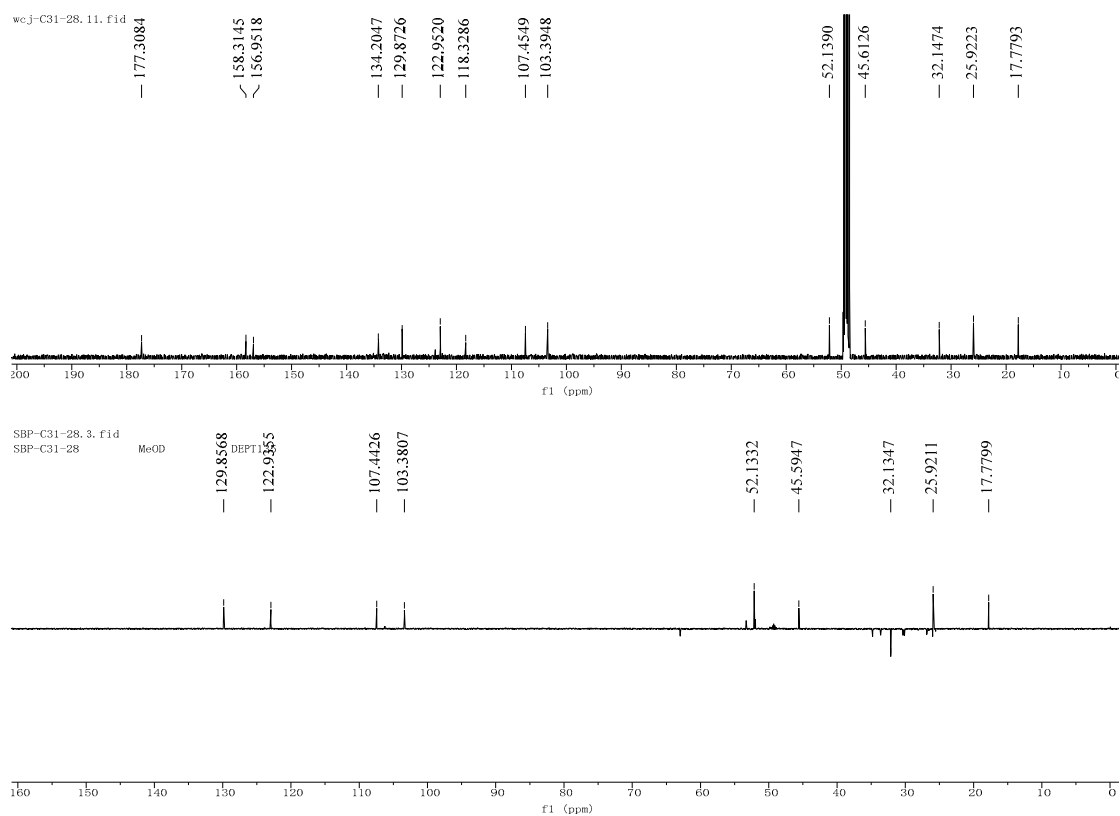

Figure S20.  $^{13}\text{C}$ -NMR and DEPT-135 spectra of compound 3 in  $\text{CD}_3\text{OD}$

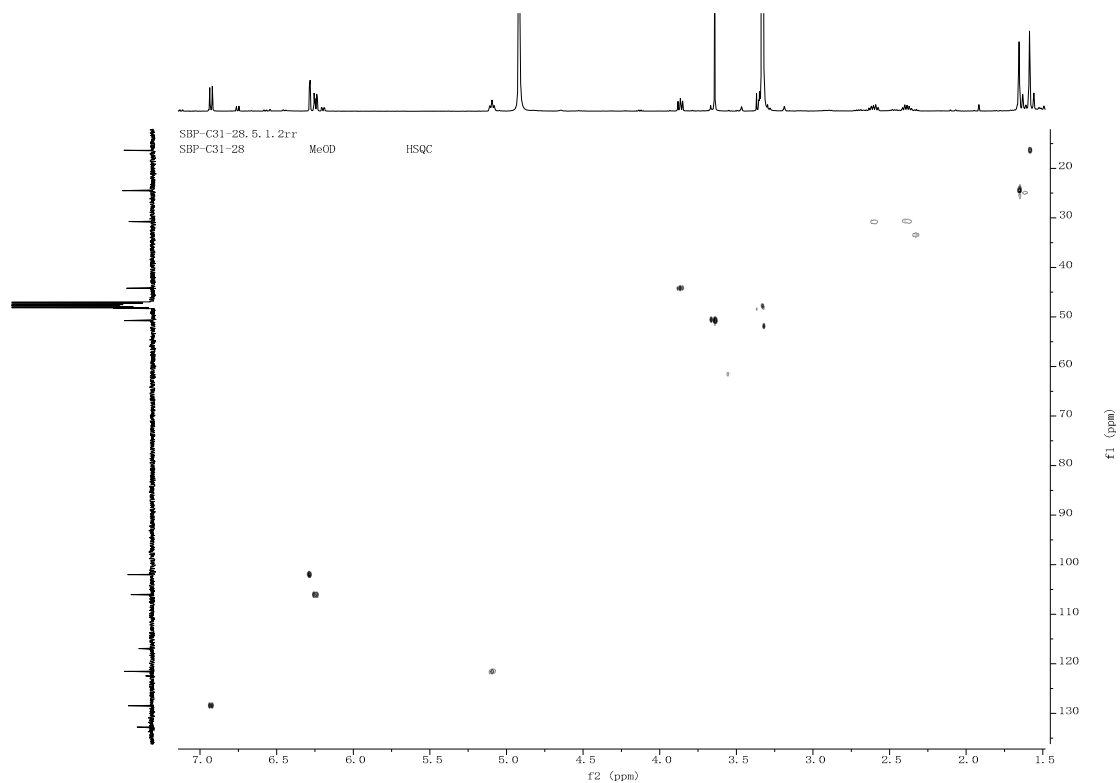

Figure S21. HSQC spectrum of compound 3

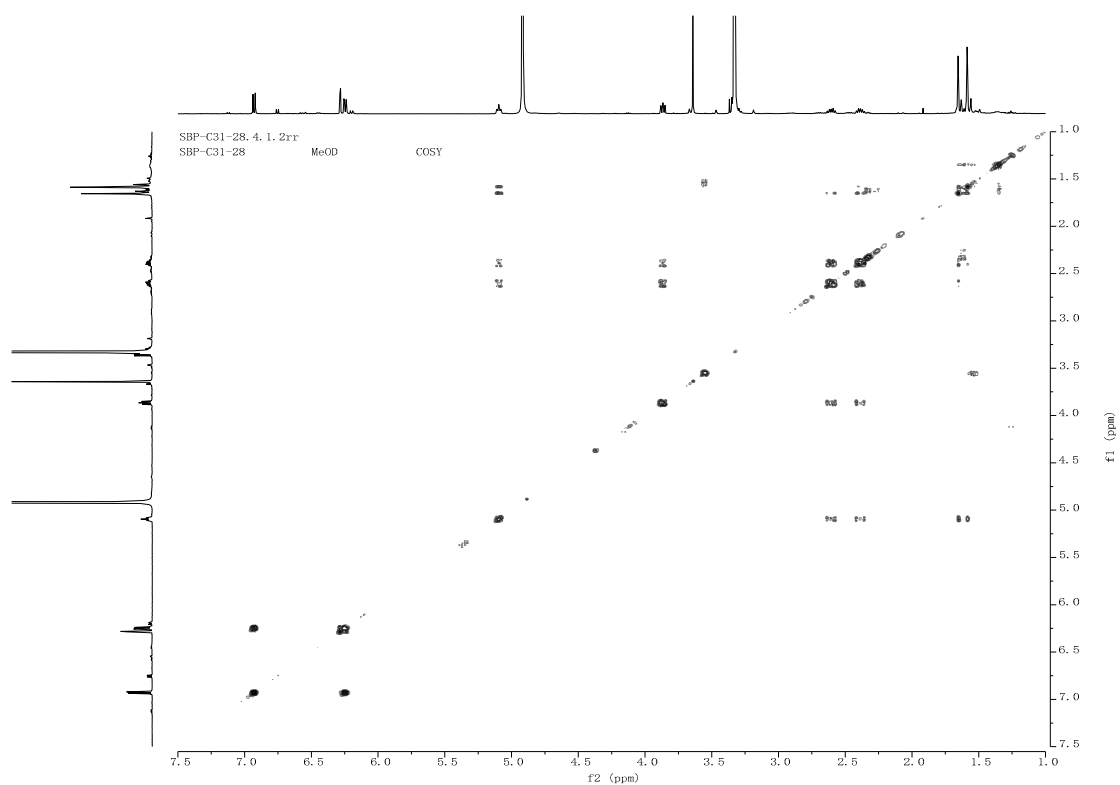

Figure S22.  $^1\text{H}$ - $^1\text{H}$  COSY spectrum of compound **3**

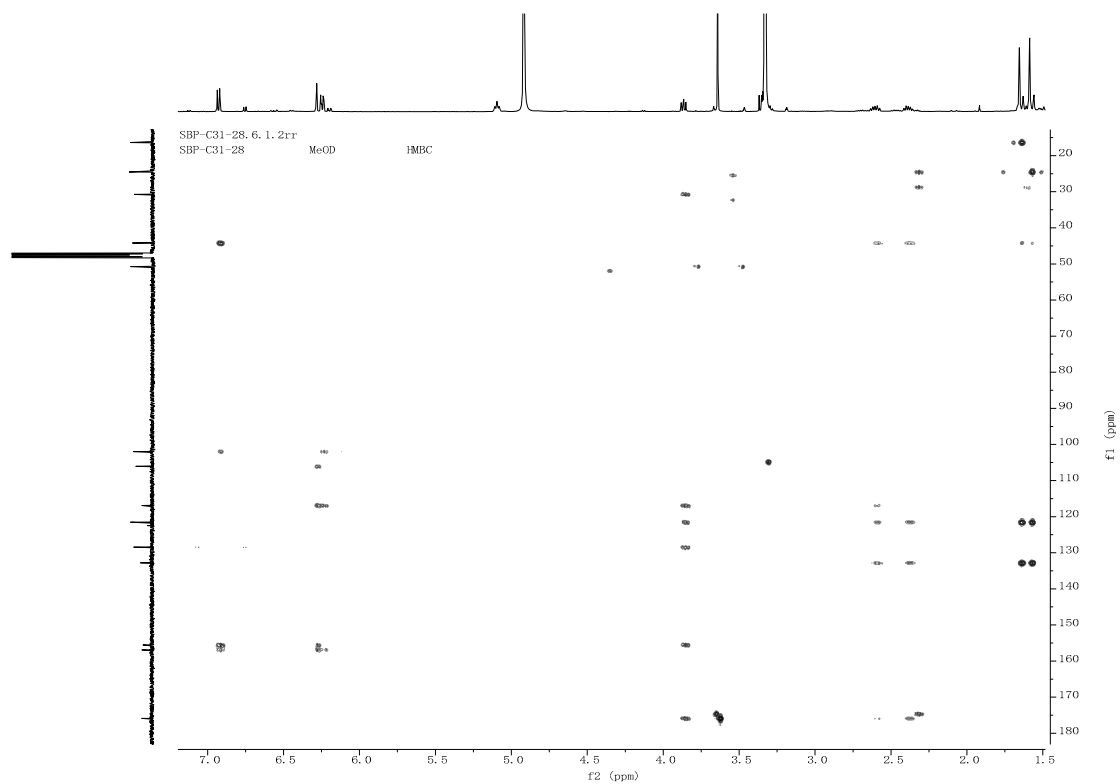

Figure S23. HMBC spectrum of compound **3**

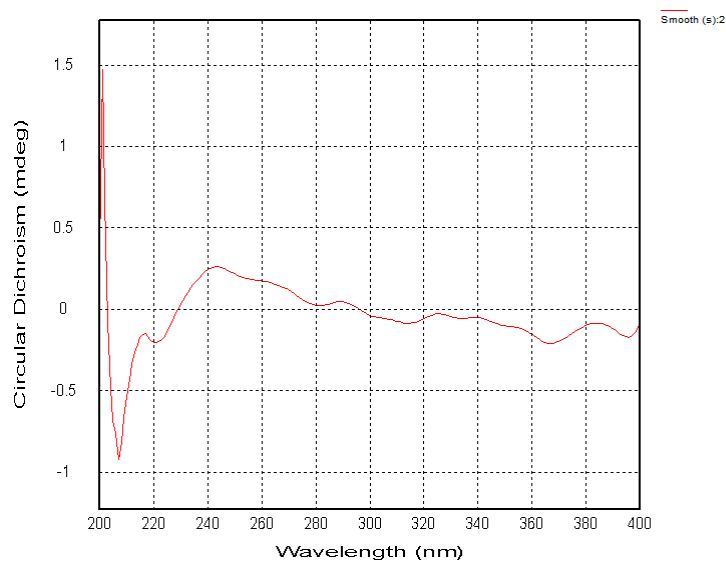

Figure S24. CD spectrum of compound 3

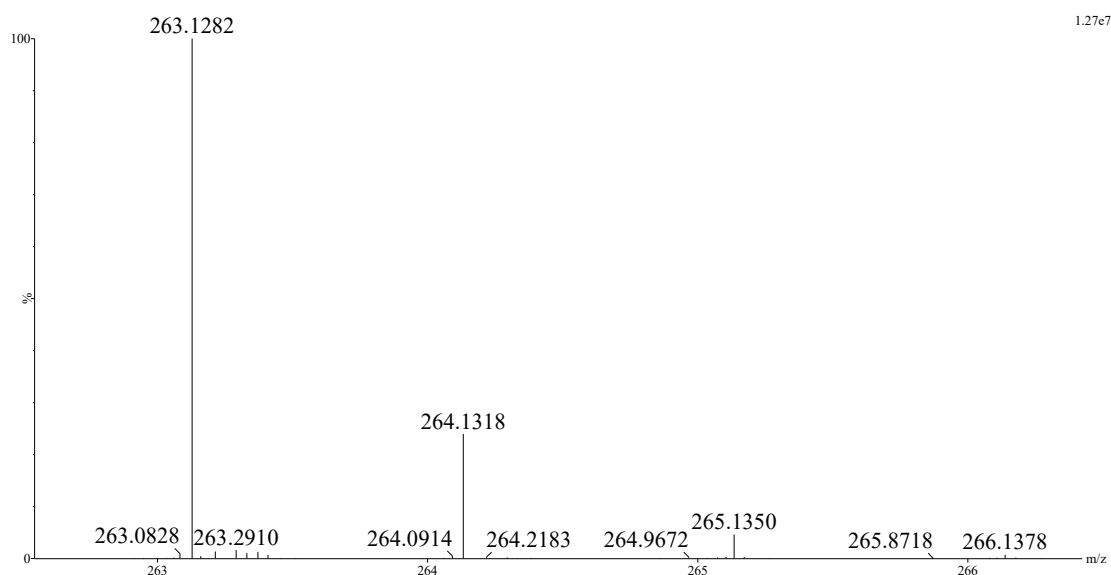

Figure S25. HRESIMS data of compound 4

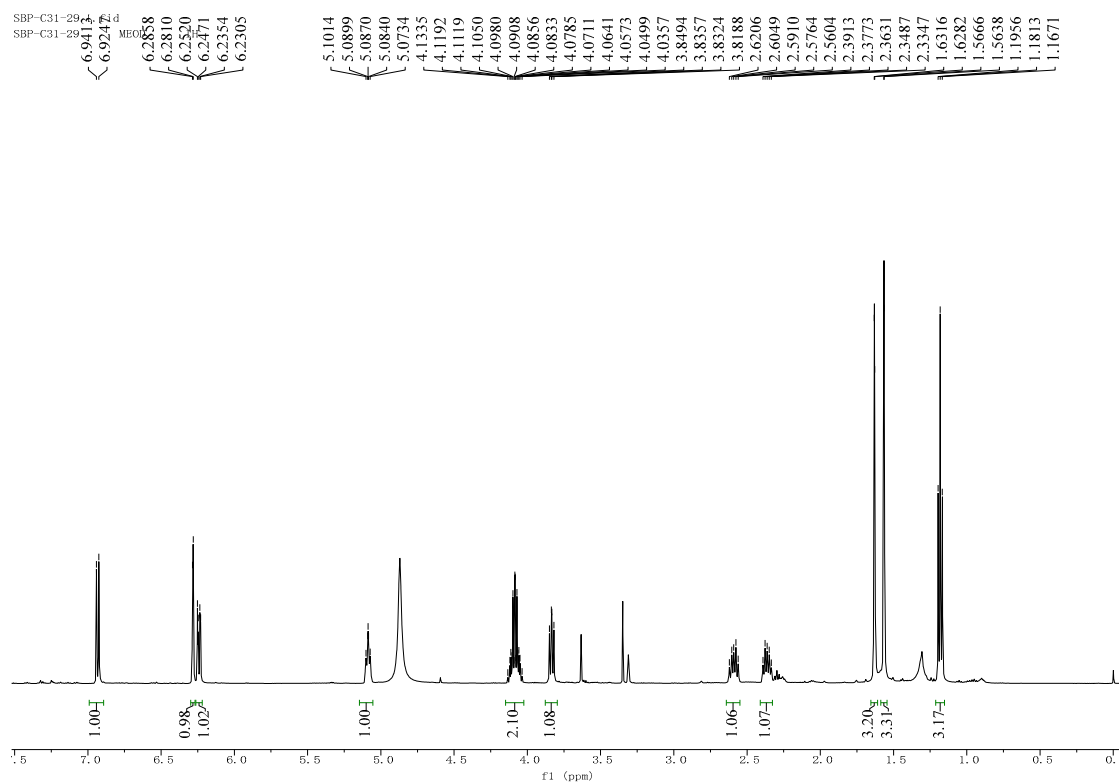

Figure S26.  $^1\text{H}$ -NMR spectrum of compound **4** in  $\text{CD}_3\text{OD}$

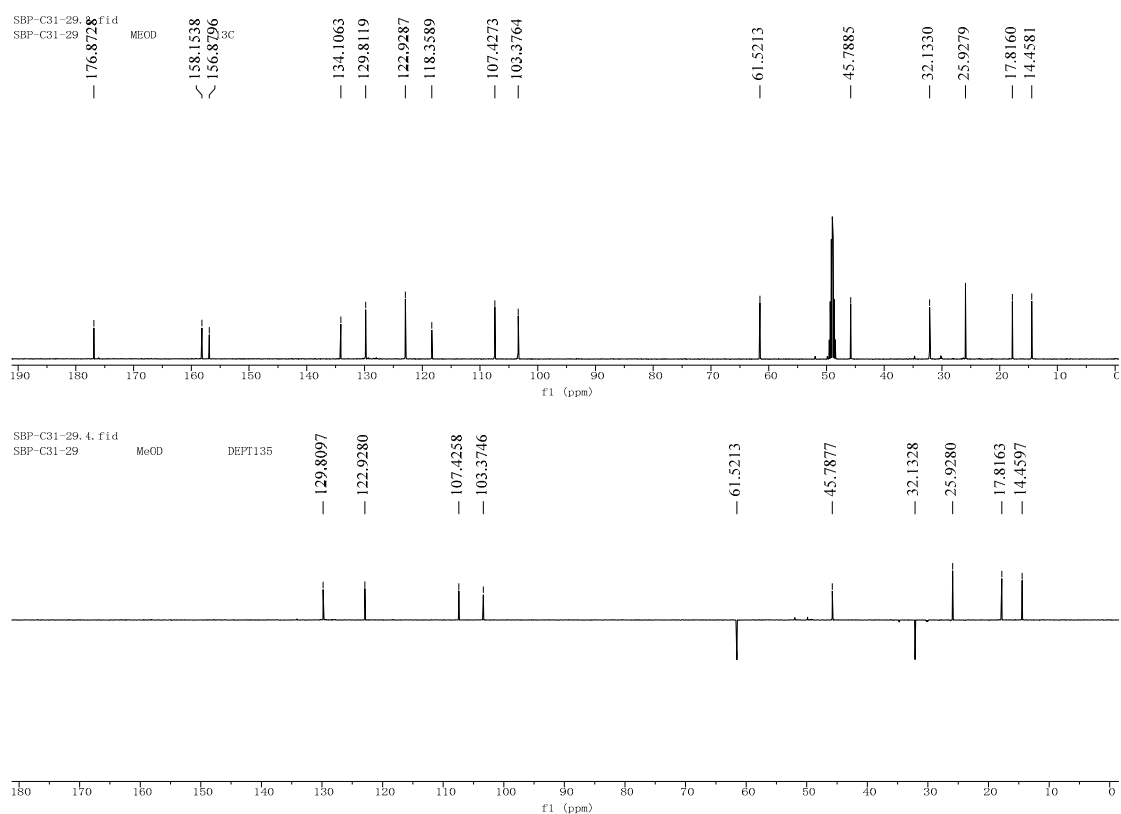

Figure S27.  $^{13}\text{C}$ -NMR and DEPT-135 spectra of compound **4** in  $\text{CD}_3\text{OD}$



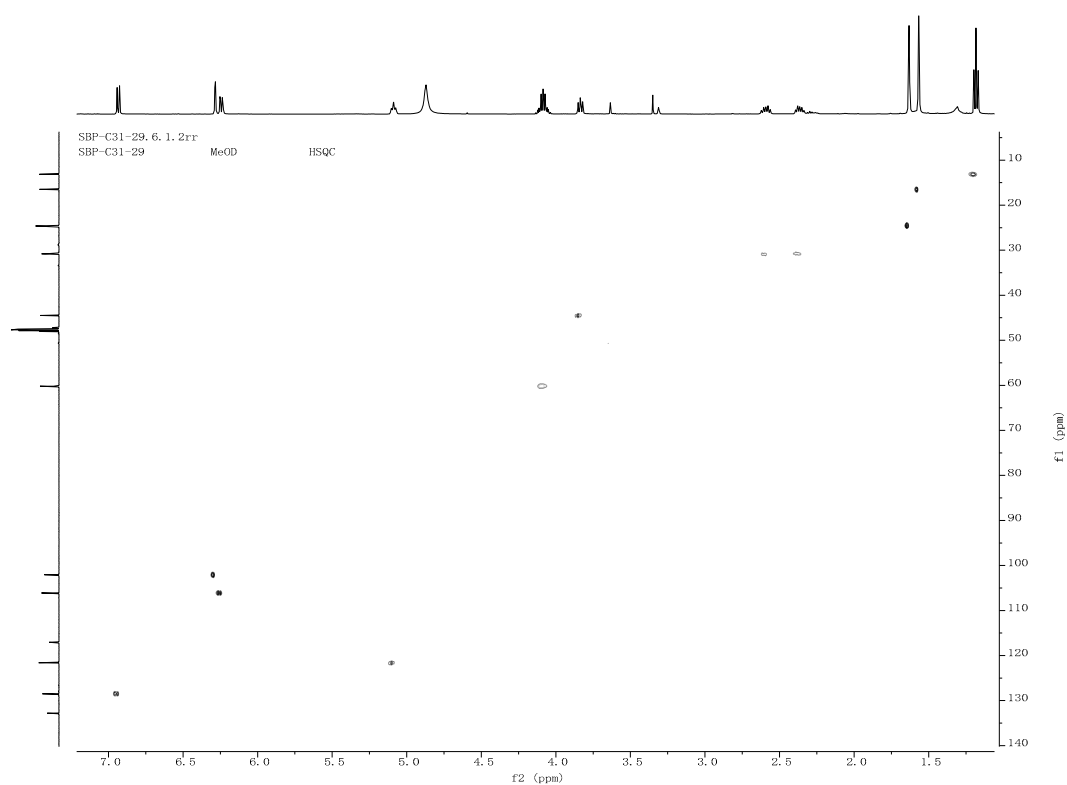

Figure S28. HSQC spectrum of compound 4

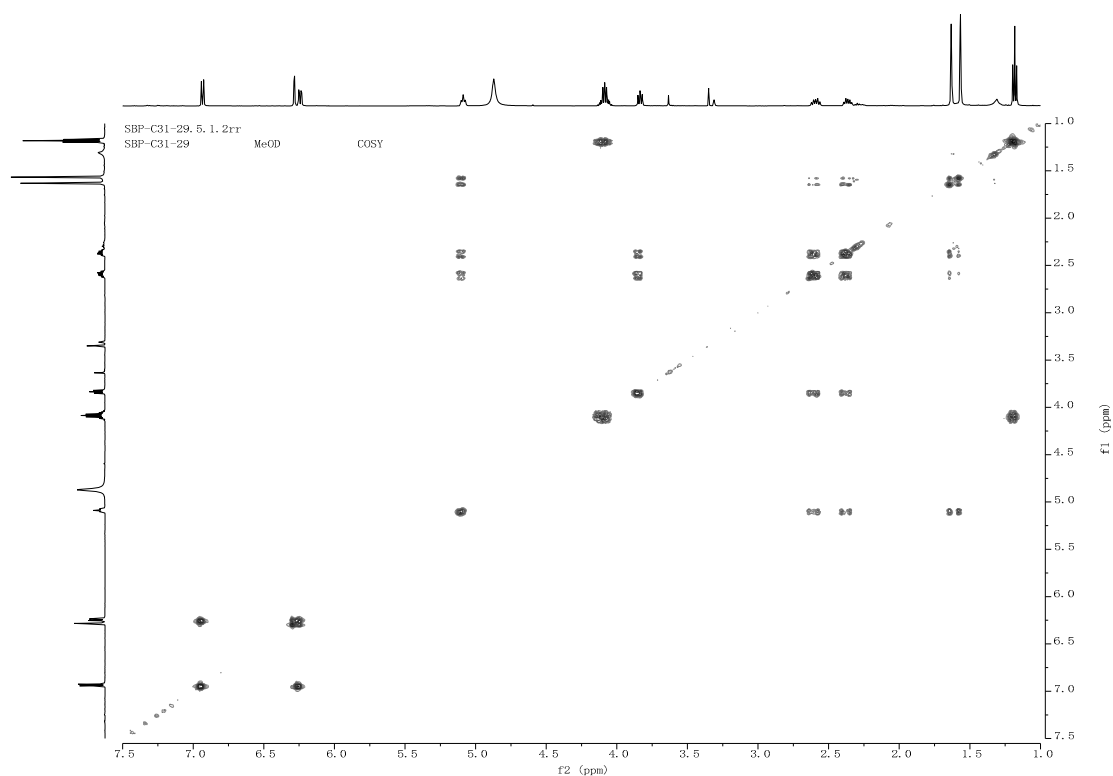

Figure S29.  $^1\text{H}$ - $^1\text{H}$  COSY spectrum of compound 4

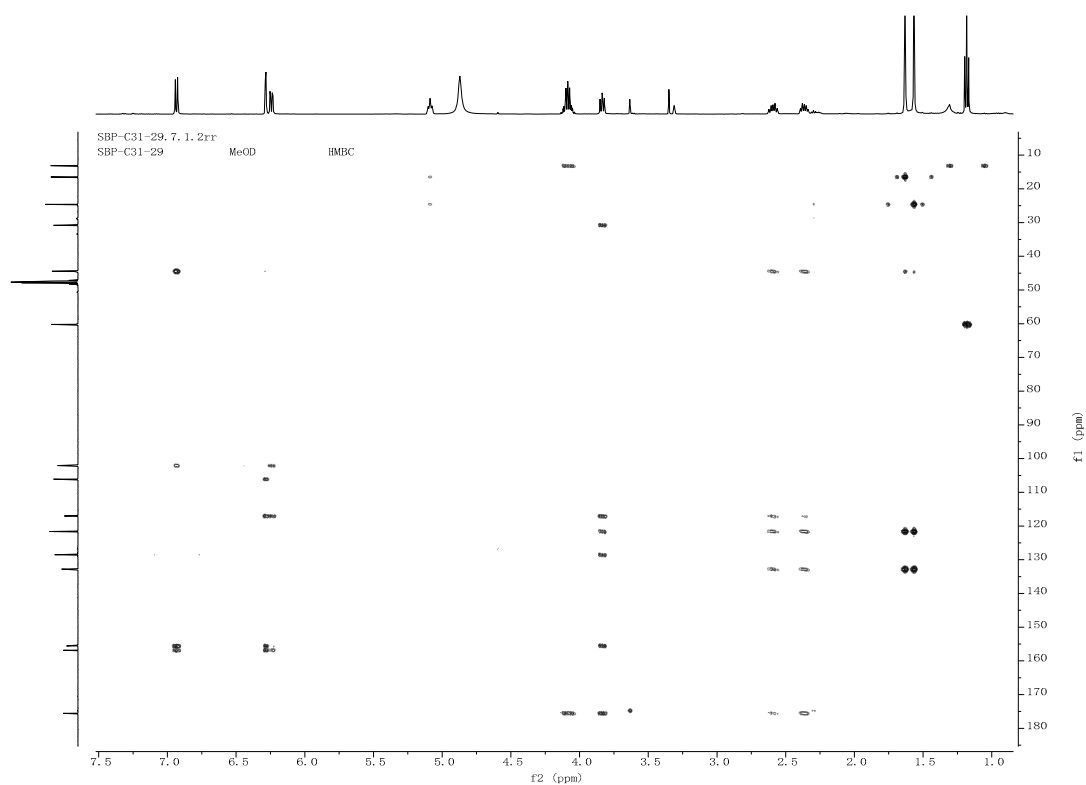

Figure S30. HMBC spectrum of compound **4**

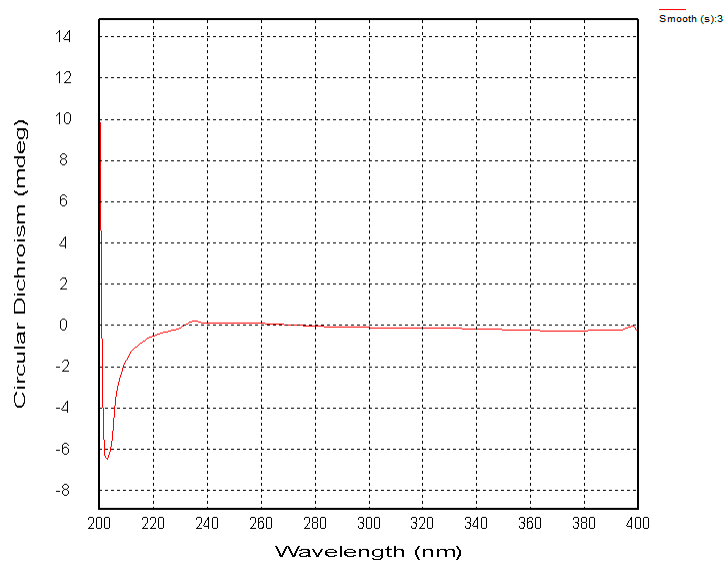

Figure S31. CD spectrum of compound **4**

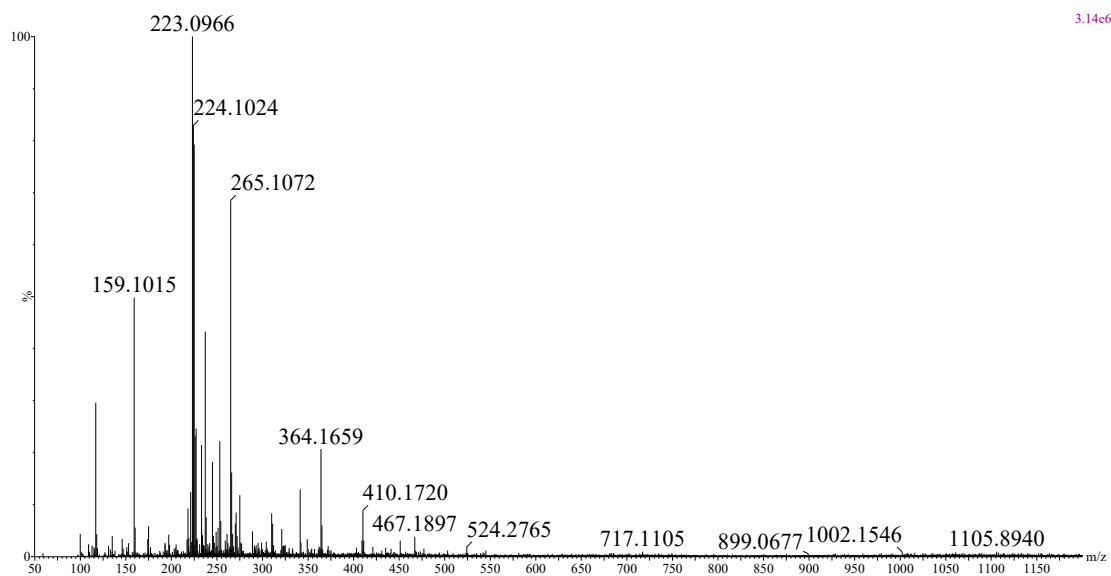

Figure S32. HRESIMS data of compound **5**

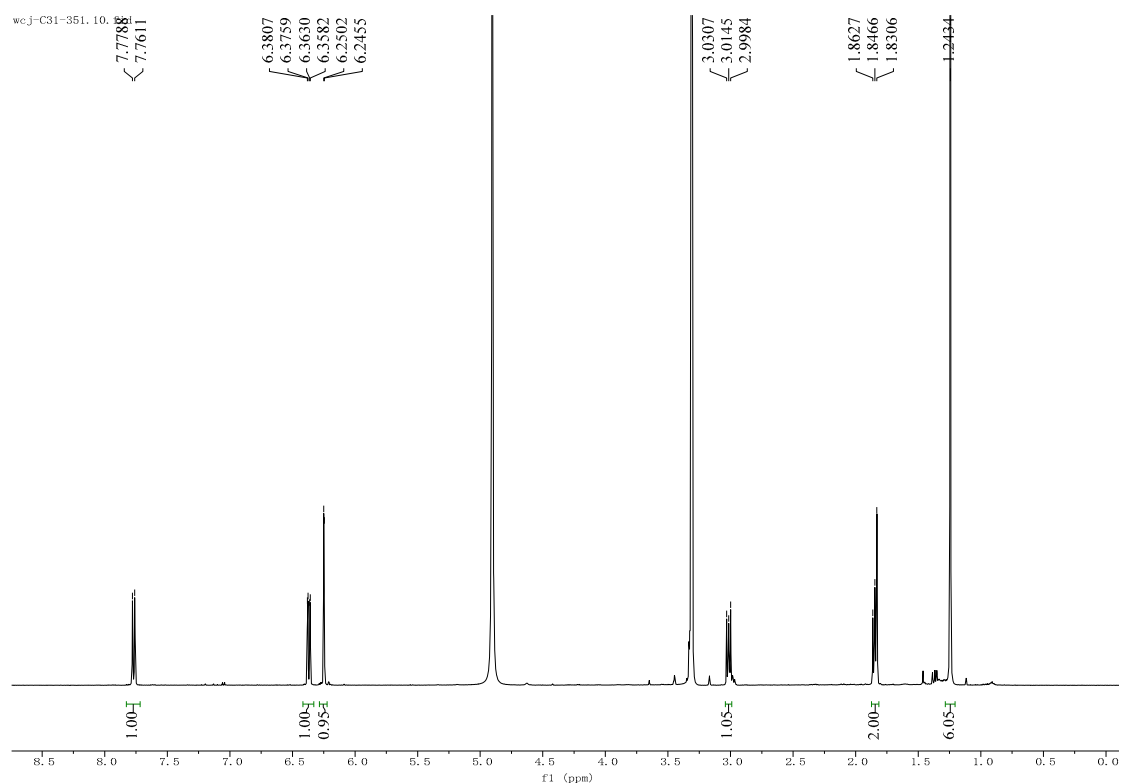

Figure S33. <sup>1</sup>H-NMR spectrum of compound **5** in CD<sub>3</sub>OD

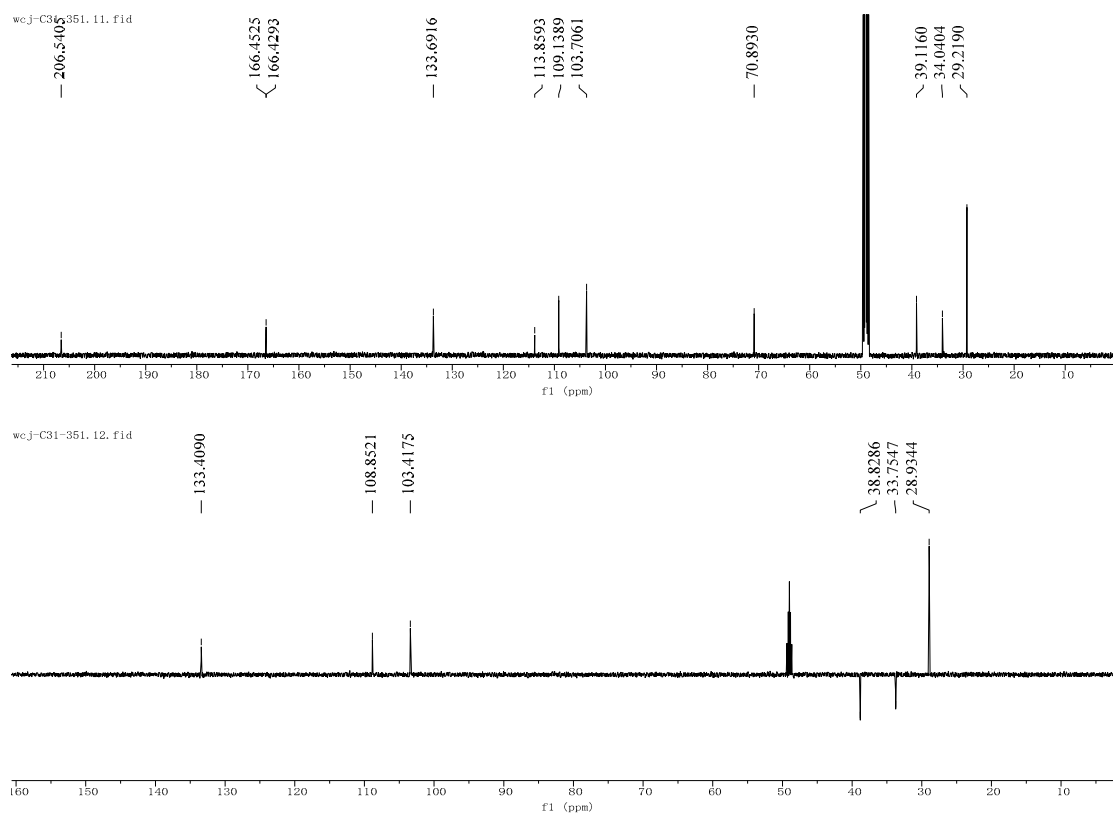

Figure S34. <sup>13</sup>C-NMR and DEPT-135 spectra of compound **5** in CD<sub>3</sub>OD

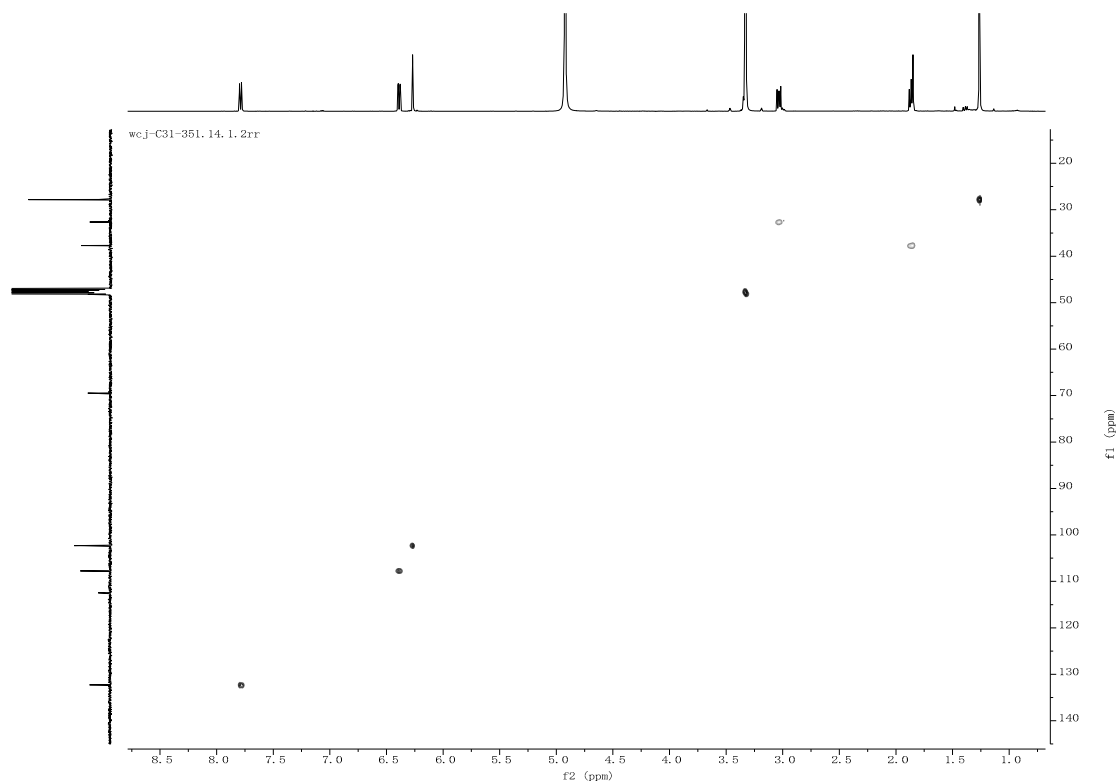

Figure S35. HSQC spectrum of compound **5**

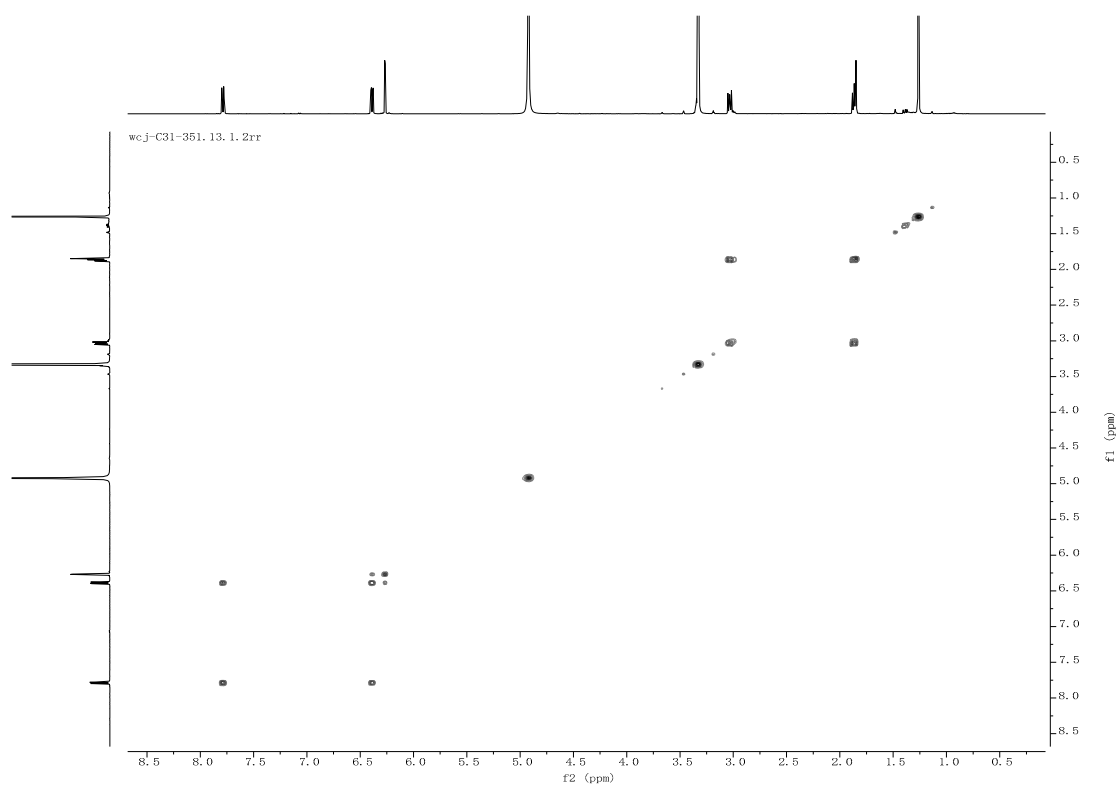

Figure S36.  $^1\text{H}$ - $^1\text{H}$  COSY spectrum of compound **5**

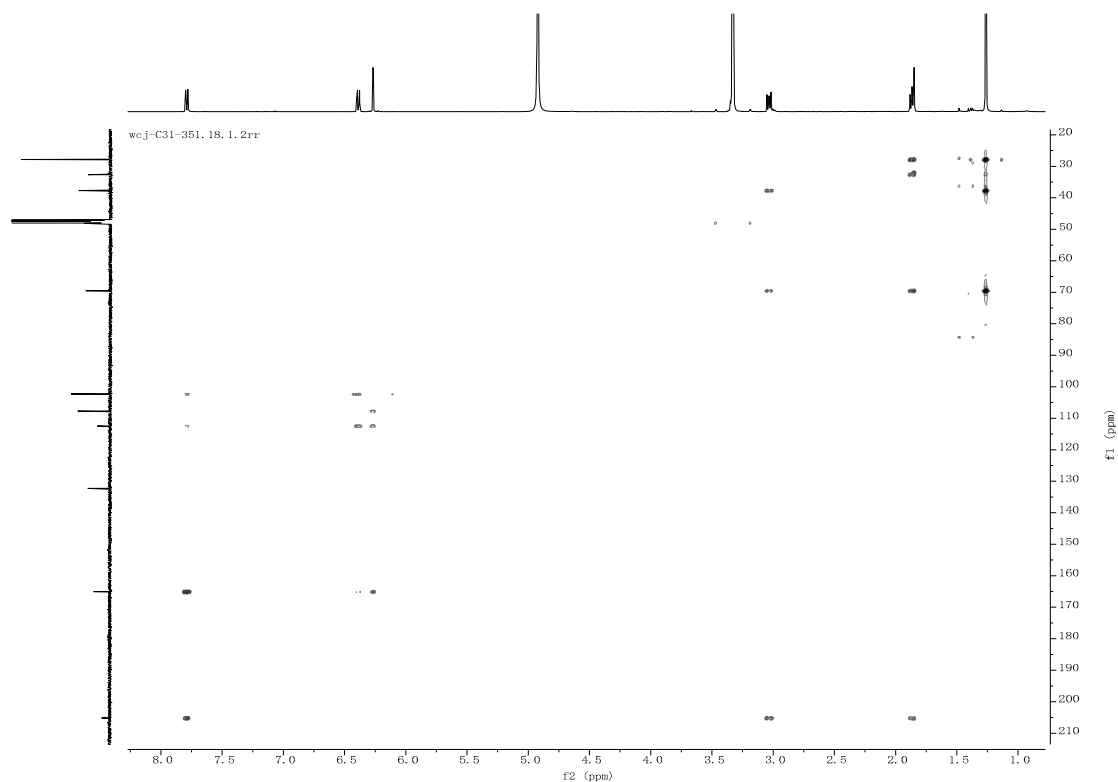

Figure S37. HMBC spectrum of compound **5**

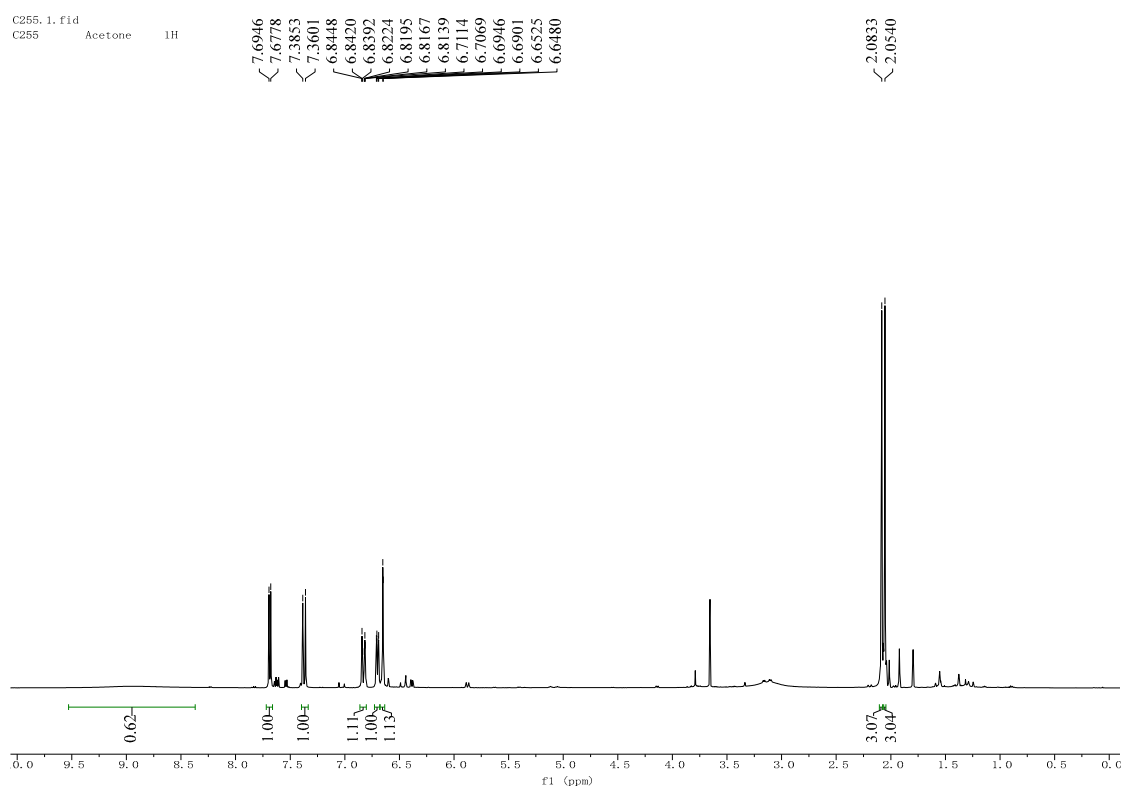

Figure S38.  $^1\text{H}$ -NMR spectrum of compound **6** in acetone- $d_6$

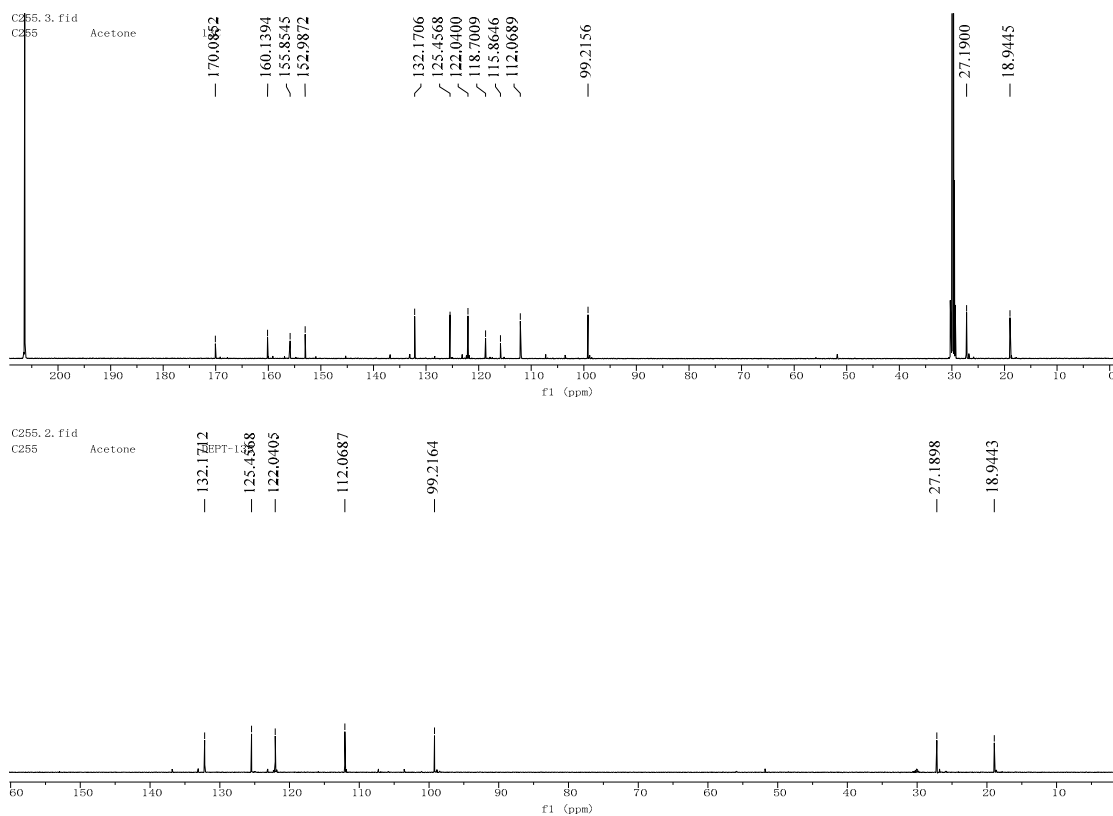

Figure S39.  $^{13}\text{C}$ -NMR and DEPT-135 spectra of compound **6** in acetone- $d_6$

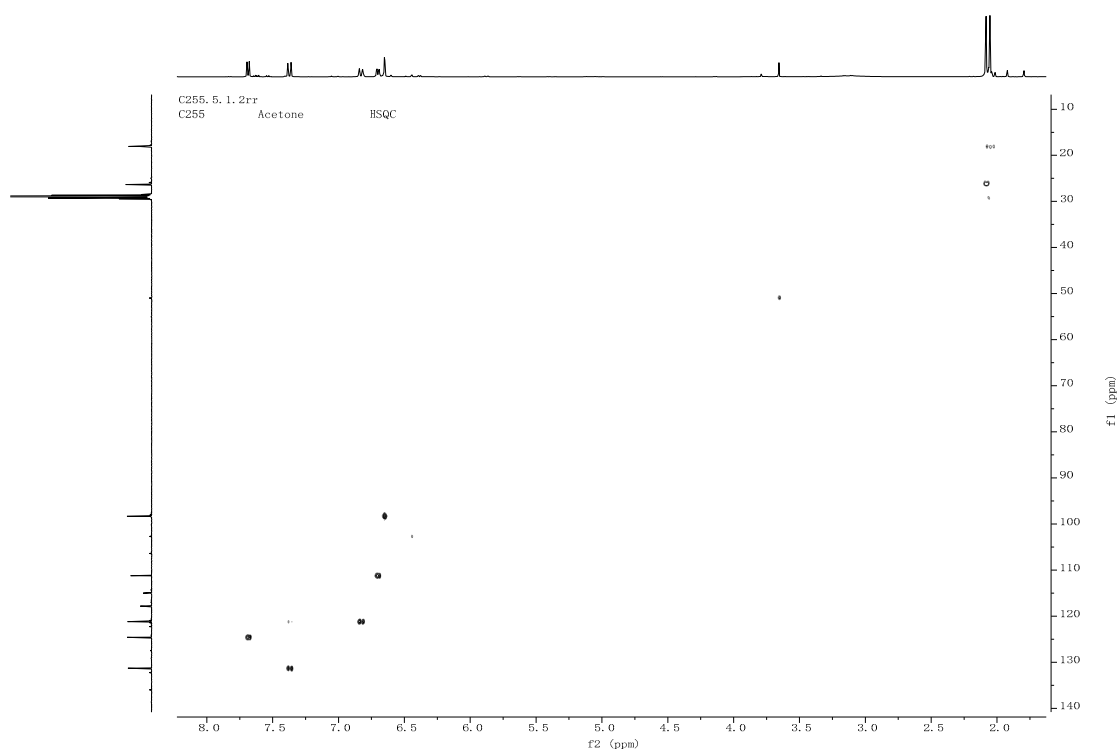

Figure S40. HSQC spectrum of compound 6

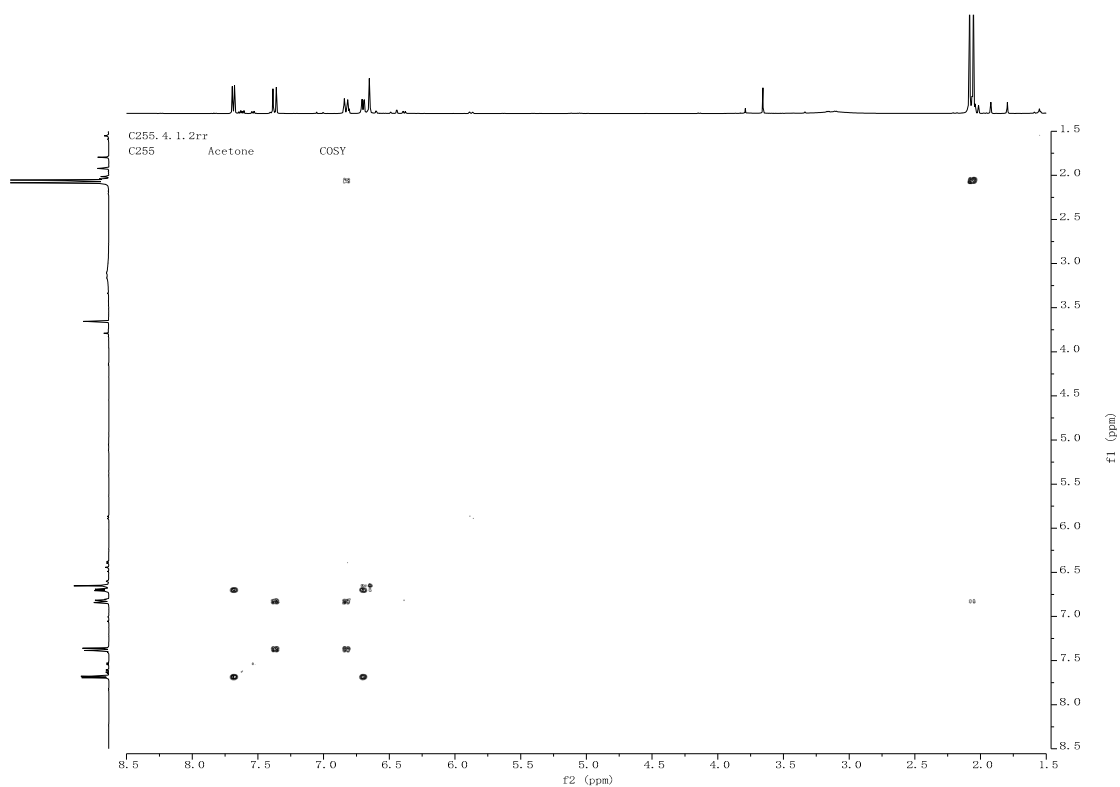

Figure S41.  $^1\text{H}$ - $^1\text{H}$  COSY spectrum of compound 6

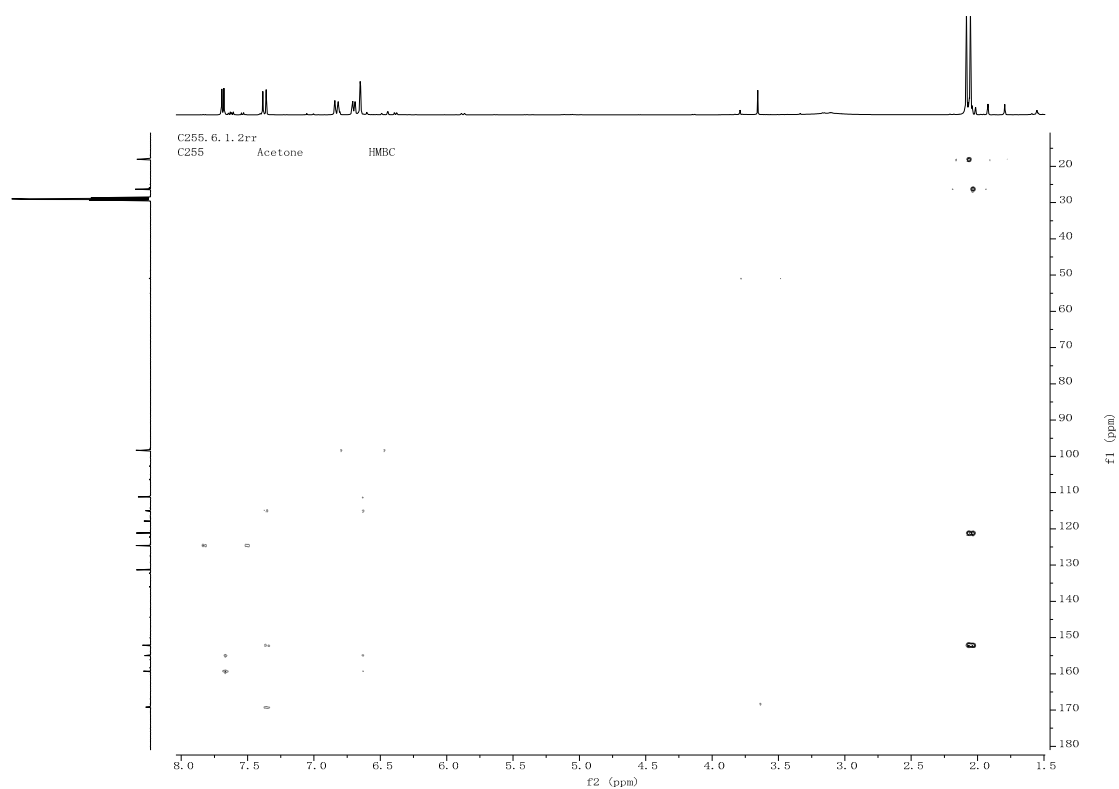

Figure S42. HMBC spectrum of compound **6**

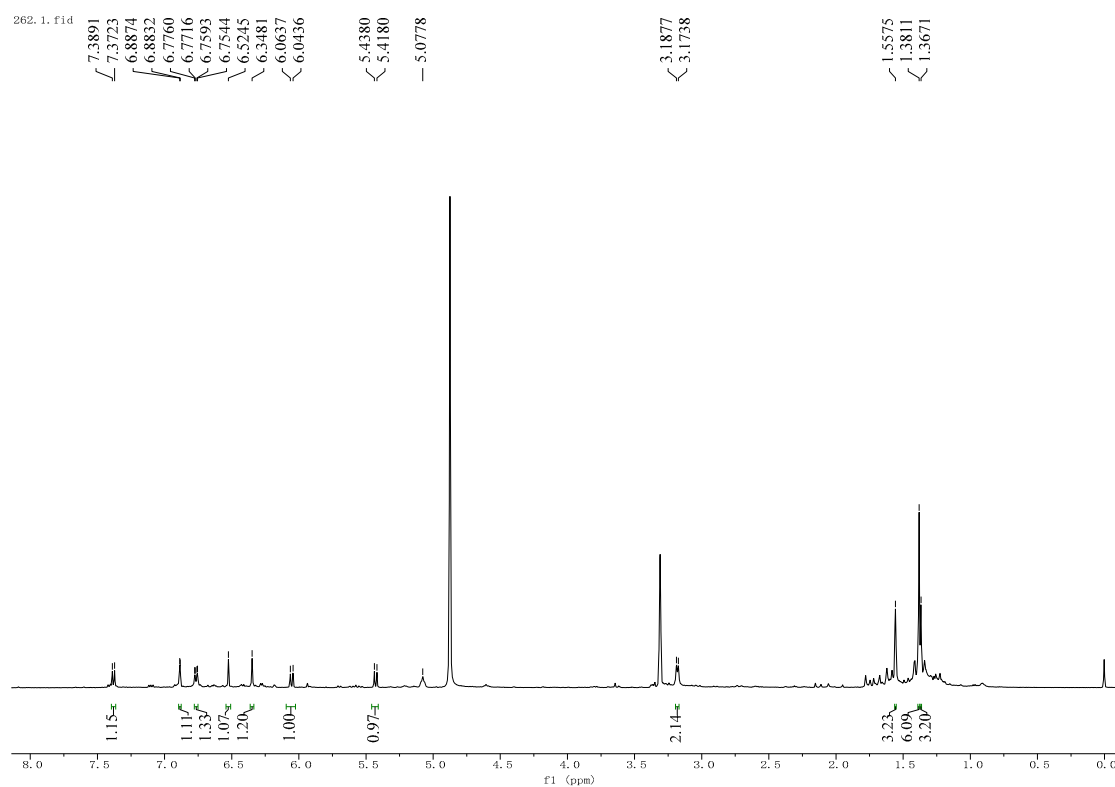

Figure S43.  $^1\text{H}$ -NMR spectrum of compound **14** in  $\text{CD}_3\text{OD}$



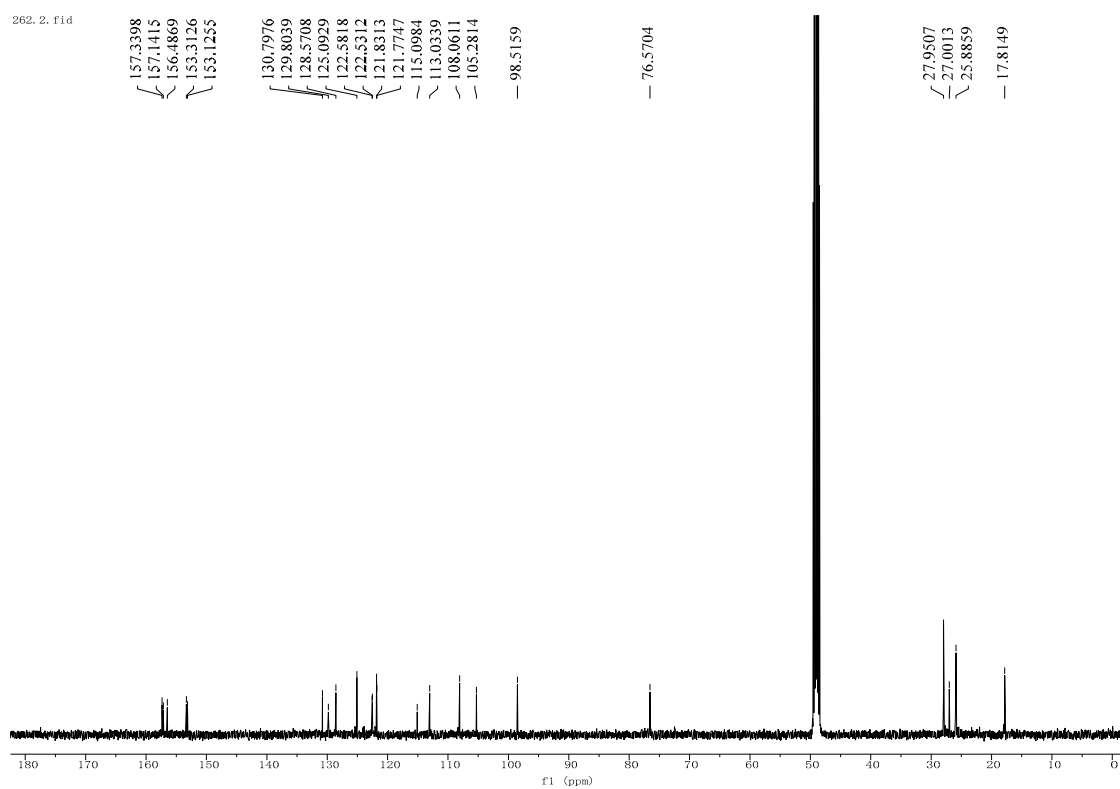

Figure S44.  $^{13}\text{C}$ -NMR spectrum of compound **14** in  $\text{CD}_3\text{OD}$
